# Supplementary material for: Glycation modulates glutamatergic signaling and exacerbates Parkinson’s disease-like phenotypes
Source: Springer Nature journal article supplement (doi:10.1038/s41531-022-00314-x), 2022-04-25
Supplement: MOESM1 [file 41531_2022_314_MOESM1_ESM.pdf]

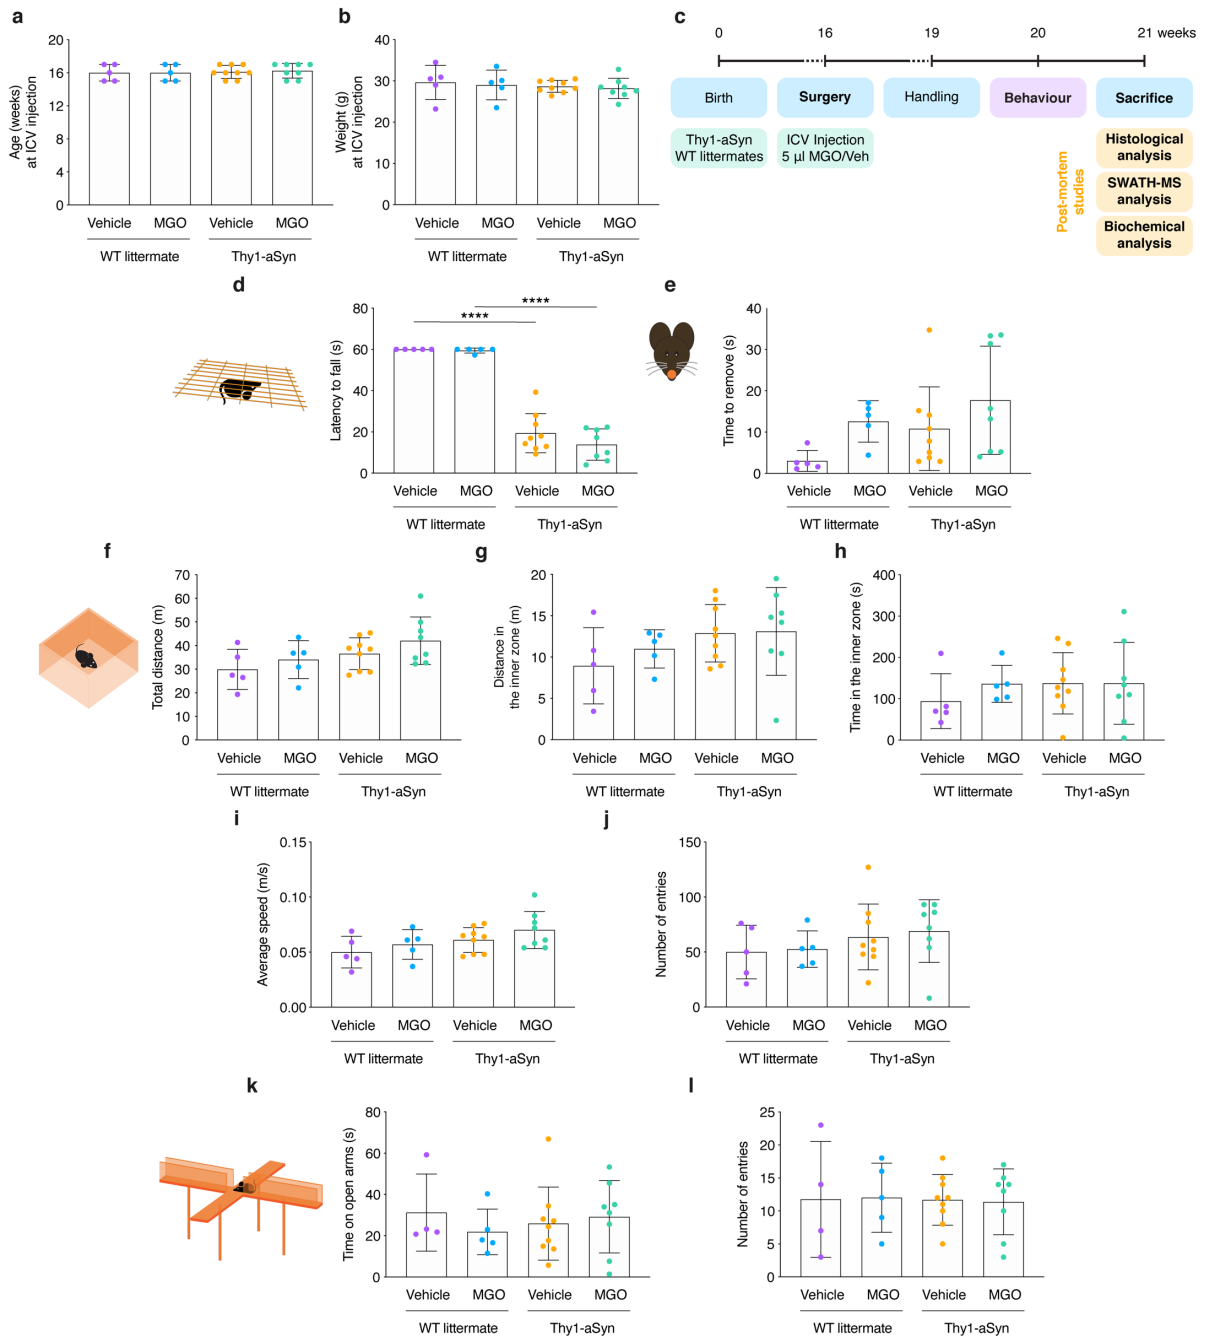

**Supplementary Figure 1. Non-altered mice behavior.** Plot representations of mice demographics: **(a)** age in weeks and **(b)** weight in g at MGO ICV injection. **(c)** Schematic of experimental design: wild-type littermate (WT) and Thy1-aSyn transgenic (Tg) mice received an intracerebroventricular (ICV) injection of MGO or vehicle (PBS) at 16 weeks of age. Behavioral testing started 4 weeks post-surgery. Plot representations of: **(d)** wire hang test; **(e)** adhesive removal test; open field test - **(f)** total distance, **(g)** distance in the inner zone, **(h)** time in the inner zone, **(i)** average speed, **(j)** number of entries; Elevated plus maze test - **(k)** time on open arms, and **(l)** number of entries; At least n=5 in all groups, data in all panels are average ± standard deviation.

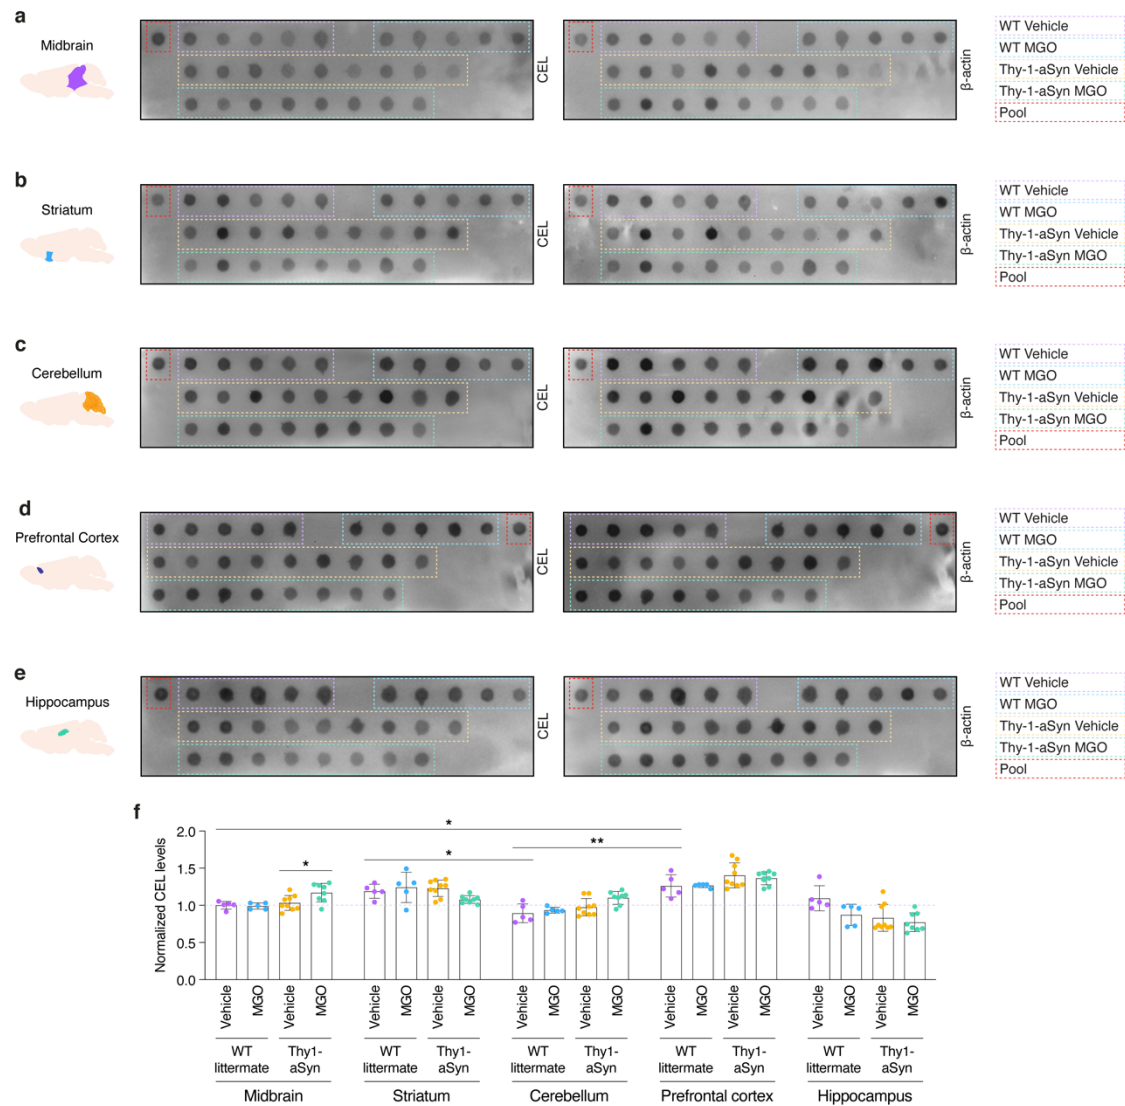

**Supplementary Figure 2. Signal of glycated protein in different brain regions of all experimental groups.** Wild-type littermate (WT) and Thy1-aSyn transgenic mice received an intracerebroventricular (ICV) injection of MGO or vehicle (PBS) and protein brain extracts from several regions analyzed 5 weeks post-injection. Protein extracts loaded into nitrocellulose membranes in a dot blot system and probed with anti-CEL and anti- $\beta$ -actin, for normalization. Representative blots from all samples from each experimental group and a pool sample for inter-gel comparison are shown for **(a)** midbrain, **(b)** striatum, **(c)** cerebellum, **(d)** prefrontal cortex and **(e)** hippocampus, respectively. **(f)** Plots of the densitometric analysis is shown comparing CEL levels between all areas and experimental groups. At least  $n=5$  in all groups, data in all panels are average  $\pm$  standard deviation, Ordinary one-way ANOVA,  $*p < 0.05$ ,  $**p < 0.01$ .

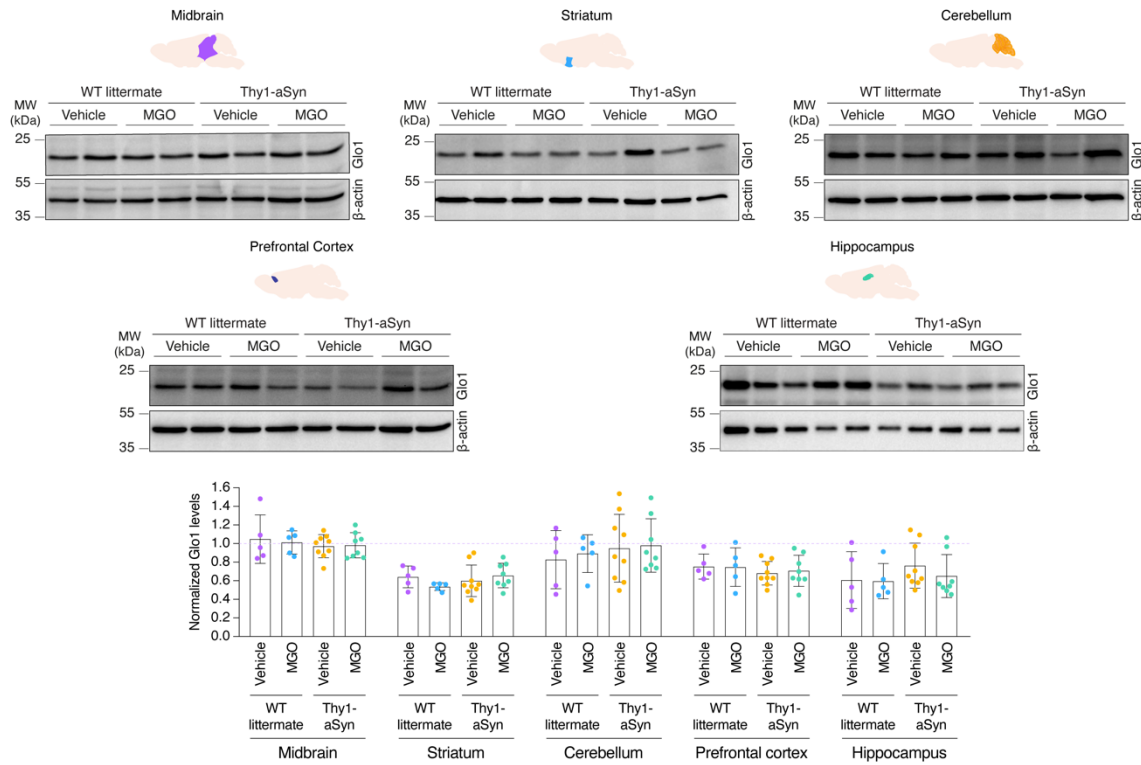

**Supplementary Figure 3. The levels of glyoxalase I are similar across different brain regions of all experimental groups.** Wild-type littermate (WT) and Thy1-aSyn transgenic mice received an intracerebroventricular (ICV) injection of MGO or vehicle (PBS) and protein brain extracts from several regions analyzed 5 weeks post-injection. Protein extracts were resolved by SDS-PAGE, loaded into membranes, and probed with anti-glyoxalase I and anti- $\beta$ -actin, for normalization. Representative blots including 2 samples from each experimental group are shown for glyoxalase I and  $\beta$ -actin. Densitometric analysis is represented comparing normalized glyoxalase I levels between all areas and experimental groups. At least  $n=5$  in all groups, data in all panels are average  $\pm$  standard deviation.

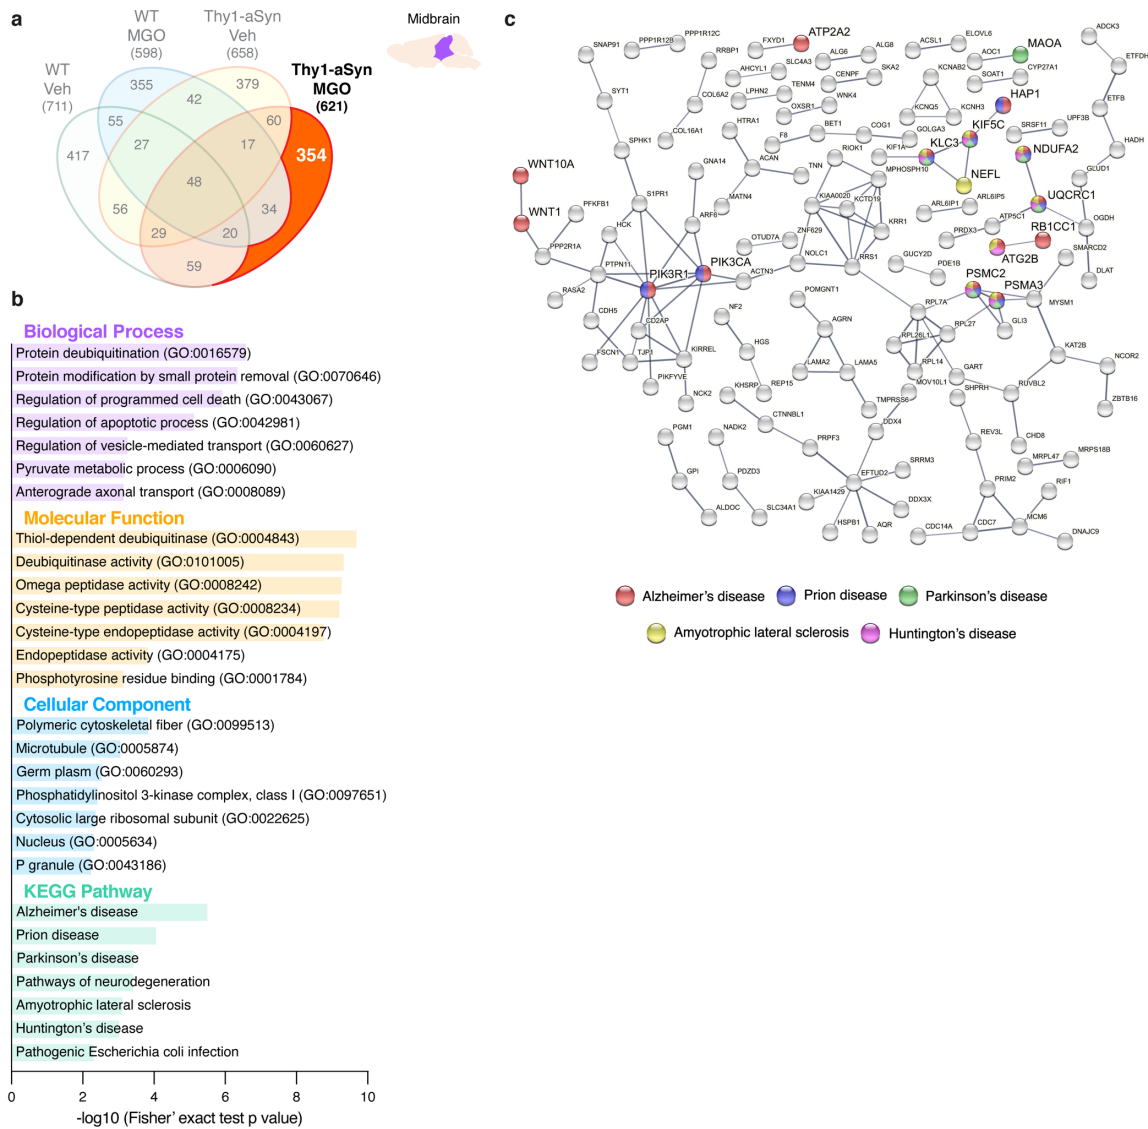

**Supplementary Figure 4. Uniquely glycosylated midbrain proteins in MGO-injected Thy1-aSyn mice correlate with neurodegenerative-associated pathways.** Glycation profile of midbrain proteins from the different experimental groups. **(a)** Venn diagram depicting uniquely glycosylated proteins in MGO-injected Thy1-aSyn mice (354). **(b)** KEGG pathways and gene ontology GO terms analysis is presented for the uniquely glycosylated proteins in MGO-injected Thy1-aSyn mice. Distribution of  $-\log_{10}$  (Fisher exact test p value) is shown. **(c)** Protein-protein interaction networks of the uniquely glycosylated proteins in MGO-injected Thy1-aSyn mice, extracted from the STRING 11.0 database. Only the proteins that are interacting within a network are shown. KEGG pathways or GO Biological processes are color coded.

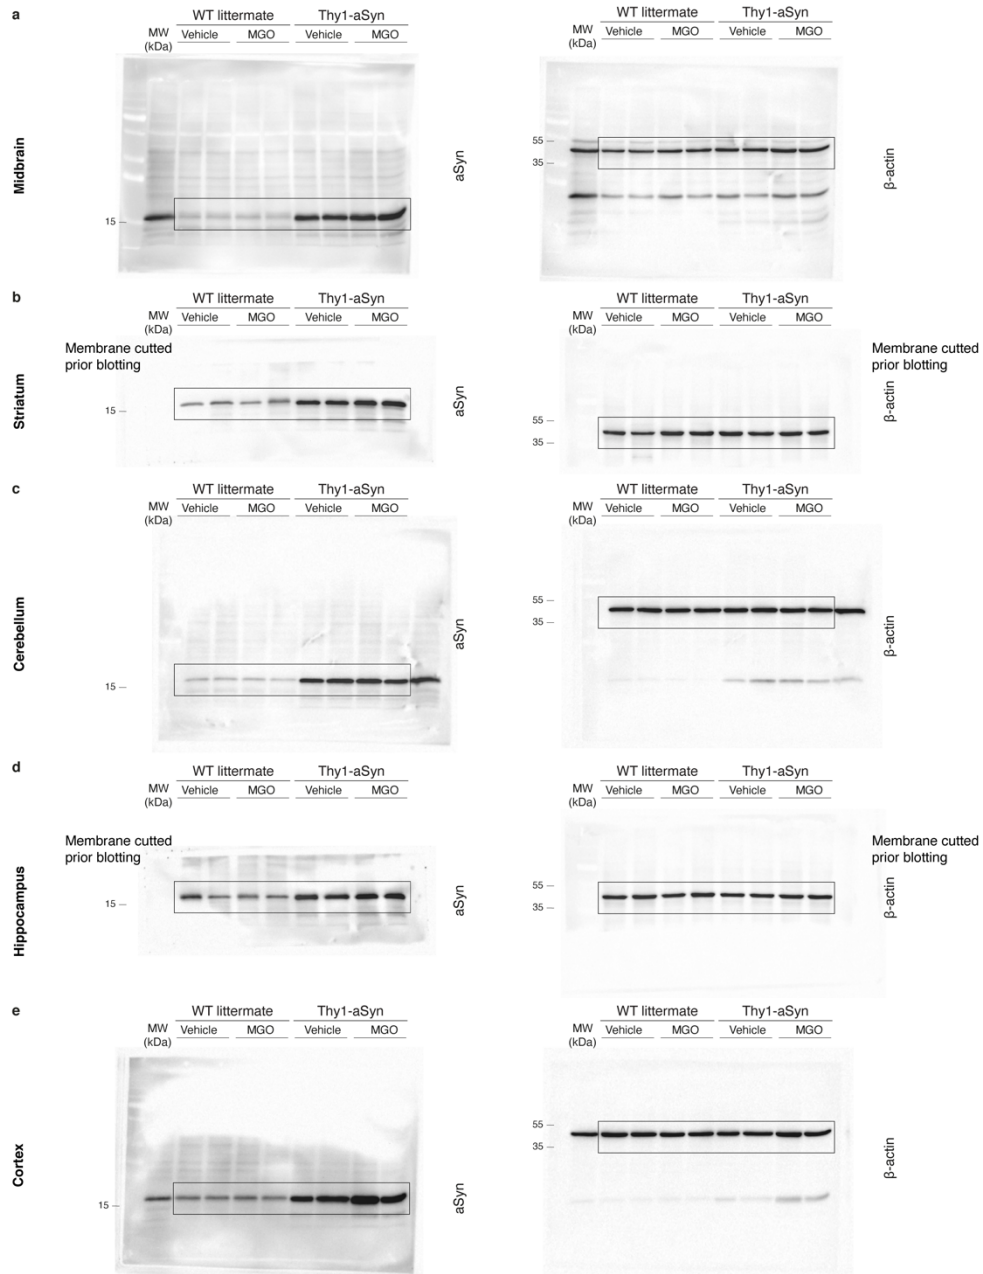

**Supplementary Figure 5. Non-cropped blots of biochemical analysis.** Non-cropped blots of data presented in Fig. 2.

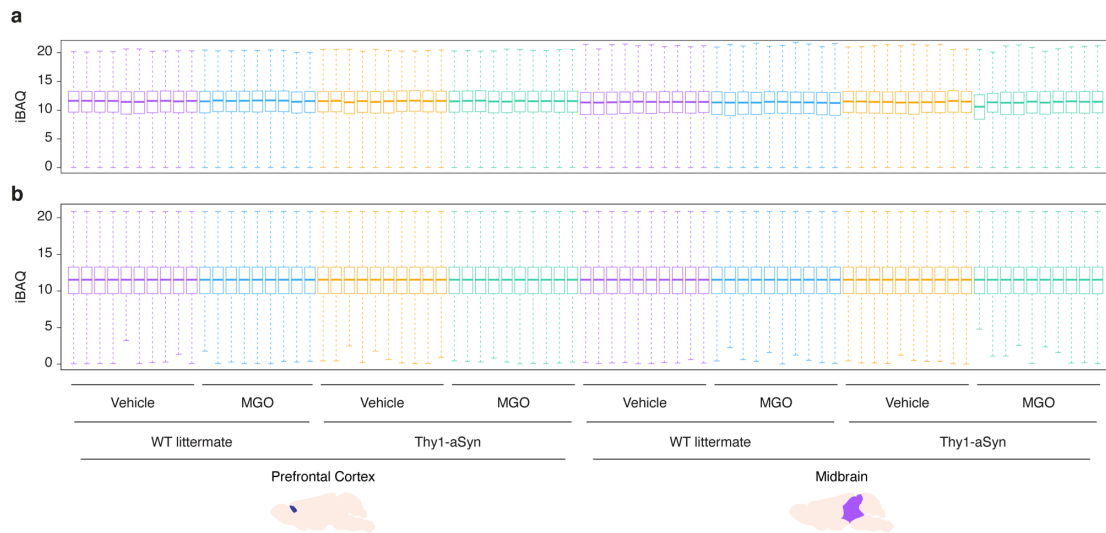

**Supplementary Figure 6. Boxplots of intensity-based absolute quantification (iBAQ) values of the SWATH-MS proteomic analysis.** Boxplot representation of outlier-removed (a) raw and (b) normalized iBAQ values for each performed SWATH-MS run.

**Supplementary Table 1. List of uniquely altered proteins in the midbrain of MGO injected Thy1-aSyn.** Mouse proteins nomenclature is used.

| <b>Protein</b>  | <b>Annotation</b>                                              | <b>Fold-change</b> |
|-----------------|----------------------------------------------------------------|--------------------|
| <b>Mapk3</b>    | Mitogen-activated protein kinase 3                             | 0.17               |
| <b>Svip</b>     | Small VCP/p97-interacting protein                              | 0.18               |
| <b>Tmem33</b>   | Transmembrane protein 33                                       | 0.23               |
| <b>Map7d2</b>   | MAP7 domain containing 2                                       | 0.25               |
| <b>Cox7a2</b>   | Cytochrome c oxidase subunit 7A2, mitochondrial                | 0.28               |
| <b>Denr</b>     | Density-regulated protein                                      | 0.30               |
| <b>Brsk2</b>    | Serine/threonine-protein kinase BRSK2                          | 0.32               |
| <b>Hmgb1</b>    | High mobility group protein B1                                 | 0.36               |
| <b>Rpl36</b>    | 60S ribosomal protein L36                                      | 0.37               |
| <b>Dhrs1</b>    | Dehydrogenase/reductase (SDR family) member 1                  | 0.41               |
| <b>Syp</b>      | Synaptophysin                                                  | 0.42               |
| <b>Lrat</b>     | Lecithin retinol acyltransferase                               | 0.44               |
| <b>Mecp2</b>    | Methyl-CpG-binding protein 2                                   | 0.49               |
| <b>Cmb1</b>     | Carboxymethylenebutenolidase homolog                           | 0.52               |
| <b>Mpp1</b>     | 55 kDa erythrocyte membrane protein                            | 0.55               |
| <b>Hpcal1</b>   | Hippocalcin-like protein 1                                     | 0.57               |
| <b>Atp1b2</b>   | Sodium/potassium-transporting ATPase subunit beta-2            | 0.57               |
| <b>Nif3l1</b>   | NIF3-like protein 1                                            | 0.58               |
| <b>Prkar2a</b>  | cAMP-dependent protein kinase type II-alpha regulatory subunit | 0.60               |
| <b>Pgd</b>      | 6-phosphogluconate dehydrogenase, decarboxylating              | 0.60               |
| <b>Apmap</b>    | Adipocyte plasma membrane-associated protein                   | 0.61               |
| <b>Map7d1</b>   | MAP7 domain containing 1                                       | 0.63               |
| <b>Csrp1</b>    | Cysteine and glycine-rich protein 1                            | 0.64               |
| <b>Dctn4</b>    | Dynactin subunit 4                                             | 0.65               |
| <b>Txn1l</b>    | Thioredoxin-like protein 1                                     | 0.65               |
| <b>Anxa5</b>    | Annexin A5                                                     | 0.65               |
| <b>Lgi3</b>     | Leucine-rich repeat LGI family member 3                        | 0.71               |
| <b>Cmpk2</b>    | UMP-CMP kinase 2, mitochondrial                                | 0.71               |
| <b>Lin7c</b>    | Protein lin-7 homolog C                                        | 0.73               |
| <b>Akr1a1</b>   | Alcohol dehydrogenase [NADP(+)]                                | 0.75               |
| <b>Nefh</b>     | Neurofilament heavy polypeptide                                | 0.75               |
| <b>Ethe1</b>    | Persulfide dioxygenase ETHE1, mitochondrial                    | 0.76               |
| <b>Eci2</b>     | Enoyl-CoA delta isomerase 2, mitochondrial                     | 0.78               |
| <b>Psat1</b>    | Phosphoserine aminotransferase                                 | 0.80               |
| <b>Serp1b1a</b> | Leukocyte elastase inhibitor A                                 | 0.81               |
| <b>Cbr1</b>     | Carbonyl reductase [NADPH] 1                                   | 1.19               |
| <b>Npepps</b>   | Puromycin-sensitive aminopeptidase                             | 1.20               |
| <b>Sirt2</b>    | NAD-dependent protein deacetylase sirtuin-2                    | 1.21               |
| <b>Pfkm</b>     | ATP-dependent 6-phosphofructokinase, muscle type               | 1.21               |

| <b>Protein</b> | <b>Annotation</b>                                                              | <b>Fold-change</b> |
|----------------|--------------------------------------------------------------------------------|--------------------|
| <b>Fam162a</b> | Protein FAM162A                                                                | 1.23               |
| <b>Uba1</b>    | Ubiquitin-like modifier-activating enzyme 1                                    | 1.24               |
| <b>Fnbp1</b>   | Formin-binding protein 1                                                       | 1.24               |
| <b>Hspa5</b>   | 78 kDa glucose-regulated protein                                               | 1.24               |
| <b>Hspd1</b>   | 60 kDa heat shock protein, mitochondrial                                       | 1.24               |
| <b>Ppp1r7</b>  | Protein phosphatase 1 regulatory subunit 7                                     | 1.25               |
| <b>Ppia</b>    | Peptidyl-prolyl cis-trans isomerase A                                          | 1.25               |
| <b>Rtcb</b>    | tRNA-splicing ligase RtcB homolog                                              | 1.25               |
| <b>Cttn</b>    | Src substrate cortactin                                                        | 1.25               |
| <b>Oxct1</b>   | Succinyl-CoA:3-ketoacid coenzyme A transferase 1, mitochondrial                | 1.25               |
| <b>My12b</b>   | Myosin regulatory light chain 12B                                              | 1.26               |
| <b>Capzb</b>   | F-actin-capping protein subunit beta                                           | 1.27               |
| <b>Actr3</b>   | Actin-related protein 3                                                        | 1.27               |
| <b>Atp6v1h</b> | V-type proton ATPase subunit H                                                 | 1.27               |
| <b>Ckb</b>     | Creatine kinase B-type                                                         | 1.27               |
| <b>Ahcy</b>    | S-adenosylhomocysteine hydrolase                                               | 1.28               |
| <b>Opa3</b>    | Optic atrophy 3 protein homolog                                                | 1.28               |
| <b>Ncl</b>     | Nucleolin                                                                      | 1.28               |
| <b>Ncam1</b>   | Neural cell adhesion molecule 1                                                | 1.28               |
| <b>Letm1</b>   | Mitochondrial proton/calcium exchanger protein                                 | 1.28               |
| <b>Blmh</b>    | Bleomycin hydrolase                                                            | 1.29               |
| <b>Nsfl1c</b>  | NSFL1 cofactor p47                                                             | 1.29               |
| <b>Pdha1</b>   | Pyruvate dehydrogenase E1 component subunit alpha, somatic form, mitochondrial | 1.29               |
| <b>Srsf1</b>   | Serine/arginine-rich splicing factor 1                                         | 1.30               |
| <b>Prkcb</b>   | Protein kinase C beta type                                                     | 1.31               |
| <b>Srm</b>     | Spermidine synthase                                                            | 1.32               |
| <b>Ndufa8</b>  | NADH dehydrogenase [ubiquinone] 1 alpha subcomplex subunit 8                   | 1.33               |
| <b>Dusp3</b>   | Dual specificity protein phosphatase 3                                         | 1.33               |
| <b>Inpp1</b>   | Inositol polyphosphate-1-phosphatase                                           | 1.34               |
| <b>Camkv</b>   | CaM kinase-like vesicle-associated protein                                     | 1.34               |
| <b>Slc1a3</b>  | Excitatory amino acid transporter 1                                            | 1.34               |
| <b>Hnrnpm</b>  | Heterogeneous nuclear ribonucleoprotein M                                      | 1.35               |
| <b>Dlg1</b>    | Disks large homolog 1                                                          | 1.35               |
| <b>Bsn</b>     | Protein bassoon                                                                | 1.35               |
| <b>Rtn1</b>    | Reticulon-1                                                                    | 1.35               |
| <b>Tpt1</b>    | Translationally-controlled tumor protein                                       | 1.36               |
| <b>Hdhd2</b>   | Haloacid dehalogenase-like hydrolase domain containing 2                       | 1.37               |
| <b>Camk1d</b>  | Calcium/calmodulin-dependent protein kinase type 1D                            | 1.38               |
| <b>Gls</b>     | Glutaminase kidney isoform, mitochondrial                                      | 1.38               |
| <b>Srcin1</b>  | SRC kinase signaling inhibitor 1                                               | 1.39               |
| <b>Gsk3b</b>   | Glycogen synthase kinase-3 beta                                                | 1.40               |



| <b>Protein</b>  | <b>Annotation</b>                                                    | <b>Fold-change</b> |
|-----------------|----------------------------------------------------------------------|--------------------|
| <b>Eno1</b>     | Alpha-enolase                                                        | 1.40               |
| <b>Pfkl</b>     | ATP-dependent 6-phosphofructokinase, liver type                      | 1.41               |
| <b>Rph3a</b>    | Rabphilin-3A                                                         | 1.41               |
| <b>Me3</b>      | Malic enzyme 3, NADP(+)-dependent, mitochondrial                     | 1.41               |
| <b>Gpr158</b>   | Probable G-protein coupled receptor 158                              | 1.41               |
| <b>Ctnnd1</b>   | Catenin (cadherin associated protein), delta 1                       | 1.41               |
| <b>Acy</b>      | ATP-citrate synthase                                                 | 1.42               |
| <b>Cyfp2</b>    | Cytoplasmic FMR1-interacting protein 2                               | 1.42               |
| <b>Ndufc2</b>   | NADH dehydrogenase [ubiquinone] 1 subunit C2                         | 1.42               |
| <b>Snd1</b>     | Staphylococcal nuclease domain-containing protein 1                  | 1.43               |
| <b>Fn3krp</b>   | Ketosamine-3-kinase                                                  | 1.43               |
| <b>Fech</b>     | Ferrochelatase, mitochondrial                                        | 1.43               |
| <b>Ppp1r1b</b>  | Protein phosphatase 1 regulatory subunit 1B                          | 1.43               |
| <b>Ube2k</b>    | Ubiquitin-conjugating enzyme E2 K                                    | 1.45               |
| <b>Sec31a</b>   | Protein transport protein Sec31A                                     | 1.46               |
| <b>Sh3bgrl3</b> | SH3 domain-binding glutamic acid-rich-like protein 3                 | 1.47               |
| <b>Actr2</b>    | Actin-related protein 2                                              | 1.47               |
| <b>C1qbp</b>    | Complement component 1 Q subcomponent-binding protein, mitochondrial | 1.48               |
| <b>Gpd1l</b>    | Glycerol-3-phosphate dehydrogenase 1-like protein                    | 1.48               |
| <b>Dpp10</b>    | Inactive dipeptidyl peptidase 10                                     | 1.49               |
| <b>Slc2a3</b>   | Solute carrier family 2, facilitated glucose transporter member 3    | 1.50               |
| <b>Gria3</b>    | Glutamate receptor 3                                                 | 1.50               |
| <b>Rgs7</b>     | Regulator of G-protein signaling 7                                   | 1.50               |
| <b>Hpcal4</b>   | Hippocalcin-like protein 4                                           | 1.56               |
| <b>Tln2</b>     | Talin-2                                                              | 1.56               |
| <b>Vps45</b>    | Vacuolar protein sorting-associated protein 45                       | 1.56               |
| <b>Prrt3</b>    | Proline-rich transmembrane protein 3                                 | 1.56               |
| <b>Mgl1</b>     | Monoglyceride lipase                                                 | 1.57               |
| <b>Psmd2</b>    | 26S proteasome non-ATPase regulatory subunit 2                       | 1.57               |
| <b>Acadl</b>    | Long-chain specific acyl-CoA dehydrogenase, mitochondrial            | 1.59               |
| <b>Isyna1</b>   | Inositol-3-phosphate synthase 1                                      | 1.60               |
| <b>Ppp3r1</b>   | Calcineurin subunit B type 1                                         | 1.60               |
| <b>Prpsap2</b>  | Phosphoribosyl pyrophosphate synthase-associated protein 2           | 1.60               |
| <b>Cdh2</b>     | Cadherin-2                                                           | 1.61               |
| <b>Dstn</b>     | Destrin                                                              | 1.61               |
| <b>Nap114</b>   | Nucleosome assembly protein 1-like 4                                 | 1.61               |
| <b>Dock3</b>    | Dedicator of cytokinesis protein 3                                   | 1.61               |
| <b>Akap5</b>    | A-kinase anchor protein 5                                            | 1.62               |
| <b>Actr3b</b>   | Actin-related protein 3B                                             | 1.62               |
| <b>Atp2b4</b>   | Plasma membrane calcium-transporting ATPase 4                        | 1.63               |
| <b>Arf6</b>     | ADP-ribosylation factor 6                                            | 1.64               |

| <b>Protein</b>  | <b>Annotation</b>                                                         | <b>Fold-change</b> |
|-----------------|---------------------------------------------------------------------------|--------------------|
| <b>Syt7</b>     | Synaptotagmin-7                                                           | 1.66               |
| <b>Grin1</b>    | Glutamate receptor ionotropic, NMDA 1                                     | 1.66               |
| <b>Pafah1b2</b> | Platelet-activating factor acetylhydrolase IB subunit beta                | 1.66               |
| <b>Kctd16</b>   | BTB/POZ domain-containing protein KCTD16                                  | 1.68               |
| <b>Mpp2</b>     | MAGUK p55 subfamily member 2                                              | 1.69               |
| <b>Gmfb</b>     | Glia maturation factor beta                                               | 1.71               |
| <b>Gria2</b>    | Glutamate receptor 2                                                      | 1.73               |
| <b>Ahcy12</b>   | Putative adenosylhomocysteinase 3                                         | 1.75               |
| <b>Acyp2</b>    | Acylphosphatase-2                                                         | 1.75               |
| <b>Slc17a7</b>  | Vesicular glutamate transporter 1                                         | 1.76               |
| <b>Adss</b>     | Adenylosuccinate synthetase isozyme 2                                     | 1.76               |
| <b>Agap2</b>    | Arf-GAP with GTPase, ANK repeat and PH domain-containing protein 2        | 1.76               |
| <b>Slc27a1</b>  | Long-chain fatty acid transport protein 1                                 | 1.77               |
| <b>Mpp6</b>     | Membrane protein, palmitoylated 6 (MAGUK p55 subfamily member 6)          | 1.79               |
| <b>Srgap3</b>   | SLIT-ROBO Rho GTPase-activating protein 3                                 | 1.80               |
| <b>Pde1a</b>    | Calcium/calmodulin-dependent 3',5'-cyclic nucleotide phosphodiesterase 1A | 1.83               |
| <b>Pde10a</b>   | cAMP and cAMP-inhibited cGMP 3',5'-cyclic phosphodiesterase 10A           | 1.85               |
| <b>Shank2</b>   | SH3 and multiple ankyrin repeat domains protein 2                         | 1.86               |
| <b>Nptxr</b>    | Neuronal pentraxin receptor                                               | 1.91               |
| <b>Slc44a2</b>  | Choline transporter-like protein 2                                        | 1.95               |
| <b>Camk2b</b>   | Calcium/calmodulin-dependent protein kinase type II subunit beta          | 1.98               |
| <b>Jakmip3</b>  | Janus kinase and microtubule interacting protein 3                        | 1.98               |
| <b>Phyhip</b>   | Phytanoyl-CoA hydroxylase-interacting protein                             | 1.99               |
| <b>Ptprn2</b>   | Receptor-type tyrosine-protein phosphatase N2                             | 2.00               |
| <b>Lphn3</b>    | Adhesion G protein-coupled receptor L3                                    | 2.01               |
| <b>Prep</b>     | Prolyl endopeptidase                                                      | 2.03               |
| <b>Chgb</b>     | Secretogranin-1                                                           | 2.05               |
| <b>Ncdn</b>     | Neurochondrin                                                             | 2.11               |
| <b>Grin2b</b>   | Glutamate receptor ionotropic, NMDA 2B                                    | 2.14               |
| <b>Anks1b</b>   | Ankyrin repeat and sterile alpha motif domain-containing protein 1B       | 2.18               |
| <b>Nt5m</b>     | 5'(3')-deoxyribonucleotidase, mitochondrial                               | 2.22               |
| <b>Mpc1</b>     | Mitochondrial pyruvate carrier 1                                          | 2.22               |
| <b>Gna11</b>    | Guanine nucleotide-binding protein subunit alpha-11                       | 2.28               |
| <b>Eif4h</b>    | Eukaryotic translation initiation factor 4H                               | 2.28               |
| <b>Map2k4</b>   | Dual specificity mitogen-activated protein kinase kinase 4                | 2.98               |
| <b>Camk2a</b>   | Calcium/calmodulin-dependent protein kinase type II subunit alpha         | 3.90               |
| <b>Hagh</b>     | Hydroxyacylglutathione hydrolase, mitochondrial                           | 3.96               |
| <b>Coro2b</b>   | Coronin-2B                                                                | 4.80               |

**Supplementary Table 2. List of uniquely altered proteins in the prefrontal cortex of MGO injected Thy1-aSyn.** Mouse proteins nomenclature is used.

| <b>Protein</b> | <b>Annotation</b>                                                          | <b>Fold-change</b> |
|----------------|----------------------------------------------------------------------------|--------------------|
| <b>Epn2</b>    | Epsin-2                                                                    | 0.12               |
| <b>Hbb-bs</b>  | Hemoglobin, beta adult s chain                                             | 0.22               |
| <b>Apoa1</b>   | Apolipoprotein A-I                                                         | 0.37               |
| <b>Cull1</b>   | Cullin-1                                                                   | 0.42               |
| <b>Esy1</b>    | Extended synaptotagmin-1                                                   | 0.45               |
| <b>Gspt1</b>   | Eukaryotic peptide chain release factor GTP-binding subunit ERF3A          | 0.48               |
| <b>Krt10</b>   | Keratin, type I cytoskeletal 10                                            | 0.50               |
| <b>Atxn10</b>  | Ataxin-10                                                                  | 0.52               |
| <b>Alb</b>     | Serum albumin                                                              | 0.52               |
| <b>Jakmip3</b> | Janus kinase and microtubule interacting protein 3                         | 0.54               |
| <b>Cyb5r3</b>  | NADH-cytochrome b5 reductase 3                                             | 0.56               |
| <b>Gps1</b>    | COP9 signalosome complex subunit 1                                         | 0.58               |
| <b>Eif2s1</b>  | Eukaryotic translation initiation factor 2 subunit 1                       | 0.62               |
| <b>Gng7</b>    | Guanine nucleotide-binding protein G(I)/G(S)/G(O) subunit gamma-7          | 0.63               |
| <b>Rbm5</b>    | RNA-binding protein 5                                                      | 0.63               |
| <b>Tmem63b</b> | CSC1-like protein 2                                                        | 0.64               |
| <b>Trmt112</b> | Multifunctional methyltransferase subunit TRM112-like protein              | 0.68               |
| <b>C1qbp</b>   | Complement component 1 Q subcomponent-binding protein, mitochondrial       | 0.69               |
| <b>Slc6a11</b> | Sodium- and chloride-dependent GABA transporter 3                          | 0.69               |
| <b>Ndufb5</b>  | NADH dehydrogenase [ubiquinone] 1 beta subcomplex subunit 5, mitochondrial | 0.69               |
| <b>Ssb</b>     | Lupus La protein homolog                                                   | 0.69               |
| <b>Tsn</b>     | Translin                                                                   | 0.70               |
| <b>Aldh9a1</b> | 4-trimethylaminobutyraldehyde dehydrogenase                                | 0.71               |
| <b>Cdh2</b>    | Cadherin-2                                                                 | 0.71               |
| <b>Gpx1</b>    | Glutathione peroxidase 1                                                   | 0.72               |
| <b>Vsnl1</b>   | Visinin-like protein 1                                                     | 0.73               |
| <b>Plp1</b>    | Myelin proteolipid protein                                                 | 0.73               |
| <b>Psap</b>    | Prosaposin                                                                 | 0.74               |
| <b>Slc3a2</b>  | 4F2 cell-surface antigen heavy chain                                       | 0.74               |
| <b>Gja1</b>    | Gap junction alpha-1 protein                                               | 0.74               |
| <b>Hp1bp3</b>  | Heterochromatin protein 1-binding protein 3                                | 0.75               |
| <b>Ppp3r1</b>  | Calcineurin subunit B type 1                                               | 0.75               |
| <b>Rps10</b>   | 40S ribosomal protein S10                                                  | 0.76               |
| <b>Itgb1</b>   | Integrin beta-1                                                            | 0.76               |
| <b>Ola1</b>    | Obg-like ATPase 1                                                          | 0.76               |
| <b>Phgdh</b>   | D-3-phosphoglycerate dehydrogenase                                         | 0.79               |
| <b>Apoo</b>    | Apolipoprotein O                                                           | 0.79               |
| <b>Atf1</b>    | Atlastin-1                                                                 | 0.80               |
| <b>Calb1</b>   | Calbindin                                                                  | 0.80               |

| <b>Protein</b>  | <b>Annotation</b>                                                       | <b>Fold-change</b> |
|-----------------|-------------------------------------------------------------------------|--------------------|
| <b>Ndufa4</b>   | Cytochrome c oxidase subunit NDUFA4                                     | 0.81               |
| <b>Cd47</b>     | Leukocyte surface antigen CD47                                          | 0.81               |
| <b>Lancl2</b>   | LanC-like protein 2                                                     | 0.81               |
| <b>Sdhb</b>     | Succinate dehydrogenase [ubiquinone] iron-sulfur subunit, mitochondrial | 0.82               |
| <b>Rtn1</b>     | Reticulon-1                                                             | 0.83               |
| <b>Sh3bgr1</b>  | SH3-binding domain glutamic acid-rich protein like                      | 0.83               |
| <b>Lmna</b>     | Prelamin-A/C                                                            | 0.83               |
| <b>Mpp2</b>     | MAGUK p55 subfamily member 2                                            | 0.83               |
| <b>Ahcy</b>     | S-adenosylhomocysteine hydrolase                                        | 0.83               |
| <b>Cadm3</b>    | Cell adhesion molecule 3                                                | 0.83               |
| <b>Qdpr</b>     | Dihydropteridine reductase                                              | 0.84               |
| <b>Aldoc</b>    | Aldolase C, fructose-bisphosphate                                       | 0.85               |
| <b>Grb2</b>     | Growth factor receptor-bound protein 2                                  | 0.86               |
| <b>Uqcrc1</b>   | Cytochrome b-c1 complex subunit 1, mitochondrial                        | 1.10               |
| <b>Nars</b>     | Asparagine--tRNA ligase, cytoplasmic                                    | 1.12               |
| <b>Rac1</b>     | Ras-related C3 botulinum toxin substrate 1                              | 1.12               |
| <b>Ndufb7</b>   | NADH dehydrogenase [ubiquinone] 1 beta subcomplex subunit 7             | 1.14               |
| <b>Pgam1</b>    | Phosphoglycerate mutase 1                                               | 1.14               |
| <b>Nfu1</b>     | NFU1 iron-sulfur cluster scaffold homolog, mitochondrial                | 1.14               |
| <b>Pafah1b2</b> | Platelet-activating factor acetylhydrolase IB subunit beta              | 1.15               |
| <b>Camk2b</b>   | Calcium/calmodulin-dependent protein kinase type II subunit beta        | 1.15               |
| <b>Myl12b</b>   | Myosin regulatory light chain 12B                                       | 1.15               |
| <b>Dnm1</b>     | Dynamin-1                                                               | 1.15               |
| <b>Ntm</b>      | Neurotrimin                                                             | 1.16               |
| <b>Dnajc11</b>  | DnaJ homolog subfamily C member 11                                      | 1.16               |
| <b>Ppp2ca</b>   | Serine/threonine-protein phosphatase 2A catalytic subunit alpha isoform | 1.18               |
| <b>Srsf1</b>    | Serine/arginine-rich splicing factor 1                                  | 1.19               |
| <b>Ppp6c</b>    | Serine/threonine-protein phosphatase 6 catalytic subunit                | 1.20               |
| <b>Actr3b</b>   | Actin-related protein 3B                                                | 1.20               |
| <b>Actr2</b>    | Actin-related protein 2                                                 | 1.20               |
| <b>Ak5</b>      | Adenylate kinase isoenzyme 5                                            | 1.21               |
| <b>Amph</b>     | Amphiphysin                                                             | 1.21               |
| <b>Hspa11</b>   | Heat shock 70 kDa protein 1-like                                        | 1.22               |
| <b>Hsp90ab1</b> | Heat shock protein HSP 90-beta                                          | 1.22               |
| <b>Gpd1</b>     | Glycerol-3-phosphate dehydrogenase 1 (soluble)                          | 1.22               |
| <b>Cfl1</b>     | Cofilin-1                                                               | 1.22               |
| <b>Trim2</b>    | Tripartite motif-containing protein 2                                   | 1.23               |
| <b>Nt5dc3</b>   | 5'-nucleotidase domain containing 3                                     | 1.23               |
| <b>Caprin1</b>  | Caprin-1                                                                | 1.24               |
| <b>Ran</b>      | GTP-binding nuclear protein Ran                                         | 1.24               |

| <b>Protein</b> | <b>Annotation</b>                                                    | <b>Fold-change</b> |
|----------------|----------------------------------------------------------------------|--------------------|
| <b>Agap2</b>   | Arf-GAP with GTPase, ANK repeat and PH domain-containing protein 2   | 1.24               |
| <b>Prrt3</b>   | Proline-rich transmembrane protein 3                                 | 1.24               |
| <b>Shank2</b>  | SH3 and multiple ankyrin repeat domains protein 2                    | 1.24               |
| <b>Arpc1a</b>  | Actin-related protein 2/3 complex subunit 1A                         | 1.25               |
| <b>Hnrnpm</b>  | Heterogeneous nuclear ribonucleoprotein M                            | 1.27               |
| <b>Efhd2</b>   | EF-hand domain-containing protein D2                                 | 1.27               |
| <b>Myo18a</b>  | Unconventional myosin-XVIIIa                                         | 1.28               |
| <b>Pip4k2c</b> | Phosphatidylinositol 5-phosphate 4-kinase type-2 gamma               | 1.28               |
| <b>Lanc11</b>  | LanC-like protein 1                                                  | 1.29               |
| <b>Paip1</b>   | Polyadenylate-binding protein-interacting protein 1                  | 1.29               |
| <b>Arpc3</b>   | Actin-related protein 2/3 complex subunit 3                          | 1.30               |
| <b>Scrn1</b>   | Secernin-1                                                           | 1.33               |
| <b>Hmgcs1</b>  | Hydroxymethylglutaryl-CoA synthase, cytoplasmic                      | 1.34               |
| <b>Gnl1</b>    | Guanine nucleotide-binding protein-like 1                            | 1.35               |
| <b>Ndufs8</b>  | NADH dehydrogenase [ubiquinone] iron-sulfur protein 8, mitochondrial | 1.43               |
| <b>Hars</b>    | Histidine--tRNA ligase, cytoplasmic                                  | 1.48               |
| <b>Rpl10a</b>  | 60S ribosomal protein L10a                                           | 1.50               |
| <b>Nme2</b>    | Nucleoside diphosphate kinase B                                      | 1.51               |
| <b>Lars</b>    | Leucine--tRNA ligase, cytoplasmic                                    | 1.52               |
| <b>Rps29</b>   | Ribosomal protein S29                                                | 1.54               |
| <b>Apmap</b>   | Adipocyte plasma membrane-associated protein                         | 1.66               |
| <b>Acadv1</b>  | Very long-chain specific acyl-CoA dehydrogenase, mitochondrial       | 1.74               |
| <b>Dyx1c1</b>  | Dynein assembly factor 4, axonemal                                   | 1.83               |
| <b>Tpm4</b>    | Tropomyosin alpha-4 chain                                            | 2.00               |

**Supplementary Table 3. List of proteins that are commonly uniquely altered in both midbrain and prefrontal cortex of MGO injected Thy1-aSyn.** Mouse proteins nomenclature is used.

| Protein         | Annotation                                                              | Fold-change |        |
|-----------------|-------------------------------------------------------------------------|-------------|--------|
|                 |                                                                         | Midbrain    | Cortex |
| <b>Camk2b</b>   | Calcium/calmodulin-dependent protein kinase type II subunit beta OS     | 1,98        | 1,15   |
| <b>C1qbp</b>    | Complement component 1 Q subcomponent-binding protein, mitochondrial OS | 1,48        | 0,69   |
| <b>Agap2</b>    | Arf-GAP with GTPase, ANK repeat and PH domain-containing protein 2 OS   | 1,76        | 1,24   |
| <b>Pafah1b2</b> | Platelet-activating factor acetylhydrolase IB subunit beta OS           | 1,66        | 1,15   |
| <b>Actr3b</b>   | Actin-related protein 3B OS                                             | 1,62        | 1,21   |
| <b>Cdh2</b>     | Cadherin-2 OS                                                           | 1,61        | 0,71   |
| <b>Prrt3</b>    | Proline-rich transmembrane protein 3 OS                                 | 1,56        | 1,25   |
| <b>Rtn1</b>     | Reticulon-1 OS                                                          | 1,35        | 0,83   |
| <b>Actr2</b>    | Actin-related protein 2 OS                                              | 1,47        | 1,21   |
| <b>Ppp3r1</b>   | Calcineurin subunit B type 1 OS                                         | 1,60        | 0,76   |
| <b>Myl12b</b>   | Myosin regulatory light chain 12B OS                                    | 1,26        | 1,16   |
| <b>Apmap</b>    | Adipocyte plasma membrane-associated protein OS                         | 0,61        | 1,83   |
| <b>Shank2</b>   | SH3 and multiple ankyrin repeat domains protein 2 OS                    | 1,86        | 1,27   |
| <b>Hnrnpm</b>   | Heterogeneous nuclear ribonucleoprotein M OS                            | 1,35        | 1,28   |
| <b>Ahcy</b>     | Adenosylhomocysteinase OS                                               | 1,28        | 0,83   |
| <b>Srsf1</b>    | Serine/arginine-rich splicing factor 1 OS                               | 1,30        | 1,20   |
| <b>Mpp2</b>     | MAGUK p55 subfamily member 2 OS                                         | 1,69        | 0,83   |
| <b>Jakmip3</b>  | Janus kinase and microtubule-interacting protein 3 OS                   | 1,98        | 0,54   |

**Supplementary Table 4. List of proteins that are altered in the midbrain of MGO-injected WT mice.** Mouse proteins nomenclature is used.

| <b>Protein</b>  | <b>Fold-change</b> | <b>Protein</b>  | <b>Fold-change</b> | <b>Protein</b>  | <b>Fold-change</b> | <b>Protein</b> | <b>Fold-change</b> |
|-----------------|--------------------|-----------------|--------------------|-----------------|--------------------|----------------|--------------------|
| <b>Gltp</b>     | 0.19               | <b>Ptpn9</b>    | 1.52               | <b>Gad2</b>     | 1.24               | <b>Calm3</b>   | 1.23               |
| <b>Uqcrh</b>    | 2.54               | <b>Iars2</b>    | 1.32               | <b>Hba</b>      | 0.33               | <b>Atp5pb</b>  | 0.35               |
| <b>Cnn3</b>     | 1.67               | <b>Twfl</b>     | 0.79               | <b>Plcl1</b>    | 1.59               | <b>Rpl7</b>    | 1.19               |
| <b>Ndufs2</b>   | 0.60               | <b>Snca</b>     | 1.60               | <b>Pafah1b1</b> | 0.81               | <b>Rab3b</b>   | 0.22               |
| <b>Ank3</b>     | 0.51               | <b>Ndufa1</b>   | 1.43               | <b>Rpl10</b>    | 1.44               | <b>Cfl1</b>    | 1.37               |
| <b>Cltc</b>     | 1.47               | <b>Rock2</b>    | 1.40               | <b>Slc6a1</b>   | 1.51               | <b>Rpl24</b>   | 1.15               |
| <b>Ppp2ca</b>   | 1.95               | <b>Cacybp</b>   | 0.75               | <b>Pgam1</b>    | 1.22               | <b>Cdc42</b>   | 1.55               |
| <b>Grb2</b>     | 0.53               | <b>Ndufa4</b>   | 0.69               | <b>Ahsa1</b>    | 1.62               | <b>Pgk1</b>    | 1.17               |
| <b>Septin2</b>  | 1.49               | <b>Nebl</b>     | 2.05               | <b>Tstd3</b>    | 0.55               | <b>Yars</b>    | 0.77               |
| <b>Atic</b>     | 0.40               | <b>Sri</b>      | 0.69               | <b>Prxl2b</b>   | 0.72               | <b>Tcea1</b>   | 0.10               |
| <b>Psm3</b>     | 1.72               | <b>Prpsap1</b>  | 1.41               | <b>Vcan</b>     | 1.30               | <b>Eif4g3</b>  | 1.64               |
| <b>Cops8</b>    | 2.03               | <b>Ptbp2</b>    | 2.16               | <b>Ndufa6</b>   | 1.29               | <b>Gyg1</b>    | 0.77               |
| <b>Fabp5</b>    | 0.51               | <b>Copa</b>     | 0.73               | <b>Pcca</b>     | 0.49               | <b>Pramel7</b> | 0.40               |
| <b>Eif5</b>     | 1.39               | <b>Dynlrb1</b>  | 1.34               | <b>Mtnd1</b>    | 0.57               | <b>St13</b>    | 0.40               |
| <b>Hars</b>     | 0.37               | <b>Ephx3</b>    | 1.66               | <b>Dad1</b>     | 0.68               | <b>Sipa1</b>   | 0.62               |
| <b>Kif5b</b>    | 2.20               | <b>Rplp0</b>    | 1.48               | <b>Abracl</b>   | 1.26               | <b>Fubp1</b>   | 1.25               |
| <b>Arhgap35</b> | 5.35               | <b>Nbea</b>     | 1.60               | <b>Klc1</b>     | 1.60               | <b>Suclg1</b>  | 1.21               |
| <b>Got2</b>     | 0.67               | <b>Prdx3</b>    | 1.39               | <b>Mtpn</b>     | 1.34               | <b>Rdx</b>     | 1.23               |
| <b>Tuba1a</b>   | 1.87               | <b>Copg2</b>    | 1.33               | <b>Nod2</b>     | 0.78               | <b>Nude</b>    | 1.44               |
| <b>Eef1g</b>    | 1.45               | <b>Clpp</b>     | 0.64               | <b>Prdx6</b>    | 0.75               | <b>Vta1</b>    | 1.22               |
| <b>Zfyve26</b>  | 1.60               | <b>Syt12</b>    | 1.87               | <b>Rpl22</b>    | 0.64               | <b>Cisd1</b>   | 0.47               |
| <b>Txndc17</b>  | 1.50               | <b>Gja1</b>     | 0.62               | <b>Pspc1</b>    | 1.65               | <b>Eef1a1</b>  | 1.20               |
| <b>Nol3</b>     | 1.58               | <b>Ppa2</b>     | 0.75               | <b>Scrn3</b>    | 1.37               | <b>Fntb</b>    | 5.34               |
| <b>Gng7</b>     | 0.62               | <b>Phgdh</b>    | 1.34               | <b>Glr5</b>     | 1.28               | <b>Akr7a2</b>  | 2.27               |
| <b>Agt</b>      | 1.86               | <b>Psm11</b>    | 1.37               | <b>Acaa2</b>    | 1.34               | <b>Nras</b>    | 1.14               |
| <b>Cltb</b>     | 1.87               | <b>Slc25a51</b> | 0.54               | <b>Myadm</b>    | 1.94               | <b>Ndufb9</b>  | 0.55               |
| <b>Hspa11</b>   | 1.80               | <b>Dpp6</b>     | 1.38               | <b>Kif15</b>    | 0.22               | <b>Shank3</b>  | 1.57               |
| <b>Pcyox1</b>   | 2.10               | <b>Ndufs4</b>   | 0.37               | <b>Psm5</b>     | 0.83               | <b>Rpl38</b>   | 1.37               |
| <b>Ehd4</b>     | 1.57               | <b>Auh</b>      | 1.37               | <b>Psm3</b>     | 1.37               | <b>Acbd6</b>   | 5.25               |
| <b>Cox5a</b>    | 1.28               | <b>Tppp</b>     | 1.33               | <b>Wbp2</b>     | 0.64               | <b>Aco2</b>    | 0.75               |
| <b>Aldh2</b>    | 1.49               | <b>Ndufb7</b>   | 1.29               | <b>Psmc6</b>    | 1.24               | <b>Pgm1</b>    | 0.74               |
| <b>Rab35</b>    | 1.60               | <b>Psap</b>     | 0.49               | <b>Ndufa13</b>  | 1.29               | <b>Sarnp</b>   | 1.17               |
| <b>Hacd3</b>    | 0.72               | <b>Vamp2</b>    | 1.50               | <b>Ywhag</b>    | 0.51               | <b>Eif3b</b>   | 0.44               |
| <b>Penk</b>     | 0.33               | <b>Krt10</b>    | 0.50               | <b>Tardbp</b>   | 1.34               | <b>Cyc1</b>    | 1.14               |
| <b>Rars</b>     | 1.59               | <b>Timm9</b>    | 0.66               | <b>Cpm</b>      | 2.68               | <b>Pded5</b>   | 1.18               |
| <b>Septin9</b>  | 1.93               | <b>Arl3</b>     | 1.38               | <b>Pcp4</b>     | 1.50               | <b>Chchd6</b>  | 0.86               |
| <b>Retreg2</b>  | 2.35               | <b>Fh</b>       | 1.21               | <b>Ppp2r1a</b>  | 1.22               | <b>Glr3</b>    | 1.38               |
| <b>Hadhb</b>    | 0.47               | <b>Cul3</b>     | 0.53               | <b>Idh2</b>     | 0.70               | <b>Ddc</b>     | 1.44               |

| <b>Protein</b>  | <b>Fold-change</b> | <b>Protein</b> | <b>Fold-change</b> | <b>Protein</b>  | <b>Fold-change</b> | <b>Protein</b>  | <b>Fold-change</b> |
|-----------------|--------------------|----------------|--------------------|-----------------|--------------------|-----------------|--------------------|
| <b>Adck1</b>    | 1.47               | <b>Abcf2</b>   | 2.09               | <b>Taldo1</b>   | 1.31               | <b>Tagln</b>    | 1.98               |
| <b>Pfn1</b>     | 1.48               | <b>Capn2</b>   | 1.25               | <b>Hspa9</b>    | 1.23               | <b>Tspan2</b>   | 0.49               |
| <b>Scrn1</b>    | 1.60               | <b>Tpm4</b>    | 0.33               | <b>Pde2a</b>    | 1.44               | <b>Atp1a3</b>   | 0.87               |
| <b>Ap3d1</b>    | 1.86               | <b>Arpe51</b>  | 1.46               | <b>Uqcr11</b>   | 0.58               | <b>Mapk10</b>   | 0.83               |
| <b>Hadh</b>     | 1.94               | <b>Set</b>     | 1.28               | <b>Nudt2</b>    | 1.34               | <b>Carhsp1</b>  | 1.25               |
| <b>Grm2</b>     | 2.59               | <b>Aak1</b>    | 1.27               | <b>Pitpna</b>   | 1.56               | <b>Dlg4</b>     | 0.75               |
| <b>Ociad2</b>   | 1.69               | <b>Lancel1</b> | 0.53               | <b>Cndp2</b>    | 0.56               | <b>Hibadh</b>   | 1.20               |
| <b>Arhgef19</b> | 1.47               | <b>Snap47</b>  | 0.52               | <b>Rpl23a</b>   | 0.50               | <b>Ywhaq</b>    | 0.48               |
| <b>Mapre2</b>   | 1.37               | <b>Gars</b>    | 1.39               | <b>Snrpg</b>    | 1.97               | <b>Idh3g</b>    | 0.86               |
| <b>Gdi2</b>     | 0.59               | <b>Nckipsd</b> | 1.22               | <b>Nedd8</b>    | 1.52               | <b>Mdh1</b>     | 0.53               |
| <b>Ppid</b>     | 1.43               | <b>Hprt1</b>   | 0.75               | <b>Cbr3</b>     | 0.58               | <b>Rexo2</b>    | 1.21               |
| <b>Kena2</b>    | 0.65               | <b>Atp5f1e</b> | 0.41               | <b>Mtch2</b>    | 0.29               | <b>Ckmt1</b>    | 0.82               |
| <b>Rida</b>     | 0.55               | <b>Atpaf1</b>  | 0.55               | <b>Cacna2d2</b> | 1.30               | <b>Unc13a</b>   | 1.38               |
| <b>Atp2a2</b>   | 1.29               | <b>Vps35</b>   | 0.81               | <b>Trmt112</b>  | 1.31               | <b>Rab14</b>    | 1.19               |
| <b>Bphl</b>     | 3.67               | <b>Rpl9</b>    | 1.58               | <b>Ly6h</b>     | 0.61               | <b>Prxl2a</b>   | 1.19               |
| <b>Sparcl1</b>  | 2.18               | <b>Esyt1</b>   | 1.76               | <b>Bcas1</b>    | 0.67               | <b>Tagln3</b>   | 1.16               |
| <b>Samm50</b>   | 0.40               | <b>Stxbp1</b>  | 1.20               | <b>Cycs</b>     | 0.84               | <b>Rpl26</b>    | 0.68               |
| <b>Kif5c</b>    | 1.79               | <b>Gnaz</b>    | 0.70               | <b>Ttc7b</b>    | 1.68               | <b>Adk</b>      | 0.56               |
| <b>Prkar1a</b>  | 1.42               | <b>Scamp5</b>  | 0.33               | <b>Wasf1</b>    | 1.54               | <b>Ctnnb1</b>   | 1.19               |
| <b>Ldha</b>     | 0.68               | <b>Gesh</b>    | 1.41               | <b>Cct2</b>     | 1.33               | <b>Atp6v1g1</b> | 0.61               |
| <b>Rab3a</b>    | 1.63               | <b>Ermn</b>    | 1.63               | <b>Pea15</b>    | 0.69               | <b>Capza2</b>   | 1.25               |
| <b>Rab5b</b>    | 1.39               | <b>Ddx6</b>    | 1.23               | <b>Aplp2</b>    | 0.36               | <b>Atad3</b>    | 0.54               |
| <b>Mtx1</b>     | 2.18               | <b>Nme1</b>    | 1.61               | <b>Ptprs</b>    | 1.60               | <b>Dlgap1</b>   | 1.90               |
| <b>Ctsd</b>     | 1.35               | <b>Hspe1</b>   | 1.41               | <b>Dnajc11</b>  | 1.31               | <b>Snrpd3</b>   | 1.20               |
| <b>Cplx1</b>    | 1.48               | <b>Pfkip</b>   | 1.22               | <b>Ahcy11</b>   | 1.42               | <b>Gpd2</b>     | 1.21               |
| <b>Coasy</b>    | 1.93               | <b>Xpo1</b>    | 1.45               | <b>Dars</b>     | 1.24               | <b>Alyref</b>   | 0.36               |
| <b>Atp6ap1</b>  | 0.41               | <b>Ppp6c</b>   | 1.34               | <b>Otud6b</b>   | 0.68               | <b>Gdpd1</b>    | 0.51               |
| <b>Lamp1</b>    | 0.37               | <b>Tspan7</b>  | 0.33               | <b>Mpi</b>      | 1.17               | <b>Beat1</b>    | 1.26               |
| <b>Ndufb5</b>   | 0.74               | <b>Strap</b>   | 1.68               | <b>Tppp3</b>    | 1.37               | <b>Mcat</b>     | 2.23               |
| <b>Cnp</b>      | 0.69               | <b>Lasp1</b>   | 1.30               | <b>Lypla2</b>   | 1.58               | <b>Psmc1</b>    | 1.34               |
| <b>Rpl27a</b>   | 0.57               | <b>Nutf2</b>   | 1.36               | <b>Slc8a2</b>   | 1.85               | <b>Vapb</b>     | 1.32               |
| <b>Vamp1</b>    | 0.42               | <b>Slc25a4</b> | 0.82               | <b>Mapre1</b>   | 1.28               | <b>Aldh1a1</b>  | 1.29               |
| <b>Ntrk2</b>    | 1.61               | <b>Tufm</b>    | 1.34               | <b>Hdgfl3</b>   | 1.87               | <b>Sv2a</b>     | 1.21               |
| <b>Ppp1cc</b>   | 1.57               | <b>Ndufs8</b>  | 1.56               | <b>Echs1</b>    | 0.80               | <b>Rpl15</b>    | 0.62               |
| <b>Pitpnc1</b>  | 1.56               | <b>Rps12</b>   | 0.70               | <b>Syng3</b>    | 0.63               | <b>Pip4k2c</b>  | 1.42               |
| <b>Ndufa12</b>  | 1.55               | <b>Ndufb1</b>  | 0.35               | <b>Tpd5212</b>  | 0.86               | <b>Arhgap44</b> | 1.65               |
| <b>Adam23</b>   | 0.50               | <b>Ivd</b>     | 0.83               | <b>Ldhb</b>     | 0.78               | <b>Praf2</b>    | 0.73               |
| <b>Gng2</b>     | 0.70               | <b>Rpl30</b>   | 0.58               | <b>Txnrd1</b>   | 1.21               | <b>Cct7</b>     | 1.20               |
| <b>Ddt</b>      | 1.56               | <b>Rpl23</b>   | 1.32               | <b>Ndufab1</b>  | 0.63               | <b>Acs16</b>    | 1.14               |
| <b>Rpl35</b>    | 1.71               | <b>Cops5</b>   | 0.58               | <b>Rps3a</b>    | 1.23               | <b>Krt75</b>    | 2.18               |



| <b>Protein</b>  | <b>Fold-change</b> | <b>Protein</b> | <b>Fold-change</b> | <b>Protein</b>  | <b>Fold-change</b> | <b>Protein</b>  | <b>Fold-change</b> |
|-----------------|--------------------|----------------|--------------------|-----------------|--------------------|-----------------|--------------------|
| <b>Ctnnd2</b>   | 1.37               | <b>Rps10</b>   | 0.78               | <b>Atp6v0d1</b> | 0.71               | <b>Ppm1a</b>    | 0.82               |
| <b>Mpc2</b>     | 0.65               | <b>Ogdh</b>    | 0.76               | <b>Cadm3</b>    | 0.87               | <b>Ptpmt1</b>   | 1.27               |
| <b>Ap1m1</b>    | 1.56               | <b>Aca1a</b>   | 3.05               | <b>Ptpa</b>     | 0.74               | <b>Pdcd6</b>    | 1.31               |
| <b>Slc27a4</b>  | 1.87               | <b>Hnrnpc</b>  | 0.65               | <b>Gstp1</b>    | 1.19               | <b>Zc3h15</b>   | 5.52               |
| <b>Fxyd6</b>    | 1.45               | <b>Usp5</b>    | 1.17               | <b>Ap1s2</b>    | 0.59               | <b>Anxa7</b>    | 1.25               |
| <b>Rpl27</b>    | 0.61               | <b>Cnrip1</b>  | 1.30               | <b>Sncb</b>     | 1.25               | <b>Vps26a</b>   | 0.66               |
| <b>Pclo</b>     | 2.01               | <b>Atp5pf</b>  | 0.59               | <b>Pdcd11</b>   | 2.81               | <b>Tcp1</b>     | 1.23               |
| <b>Me2</b>      | 1.76               | <b>Gucy1b1</b> | 1.58               | <b>Ykt6</b>     | 1.38               | <b>Aldh9a1</b>  | 1.31               |
| <b>Ndufs5</b>   | 1.38               | <b>Coro1c</b>  | 1.33               | <b>Oxr1</b>     | 1.36               | <b>Gabra1</b>   | 1.46               |
| <b>H1f0</b>     | 1.46               | <b>Cab39</b>   | 1.54               | <b>Bag6</b>     | 0.46               | <b>H2afv</b>    | 0.59               |
| <b>Appl1</b>    | 2.15               | <b>Ywhah</b>   | 0.62               | <b>Slc25a12</b> | 1.19               | <b>Syt1</b>     | 1.28               |
| <b>Gmps</b>     | 1.22               | <b>Itgb1</b>   | 0.70               | <b>Ndufv2</b>   | 1.22               | <b>Cherp</b>    | 1.94               |
| <b>Rps28</b>    | 1.52               | <b>Psbm5</b>   | 0.56               | <b>Aldh1l1</b>  | 1.28               | <b>Afg3l2</b>   | 0.89               |
| <b>Atp6v1g2</b> | 1.42               | <b>Lnpk</b>    | 0.42               | <b>Negr1</b>    | 1.23               | <b>Hnrnpd</b>   | 0.63               |
| <b>Tsn</b>      | 0.73               | <b>Cirbp</b>   | 2.06               | <b>Arpc3</b>    | 1.24               | <b>Nae1</b>     | 0.50               |
| <b>Rab10</b>    | 1.38               | <b>Rack1</b>   | 1.56               | <b>Krt85</b>    | 1.44               | <b>Hsd17b4</b>  | 1.17               |
| <b>Pls1</b>     | 0.40               | <b>Atp6v1a</b> | 1.15               | <b>Gstm7</b>    | 2.00               | <b>Napb</b>     | 0.55               |
| <b>Rab7a</b>    | 1.39               | <b>Lanc12</b>  | 0.63               | <b>Diras2</b>   | 1.40               | <b>Aldh6a1</b>  | 0.87               |
| <b>Gphn</b>     | 0.63               | <b>Rcn2</b>    | 1.58               | <b>Acot7</b>    | 0.66               | <b>Pdxk</b>     | 0.75               |
| <b>Park7</b>    | 1.28               | <b>Abcd3</b>   | 1.32               | <b>Cul2</b>     | 1.52               | <b>Maoa</b>     | 0.87               |
| <b>Cplx2</b>    | 1.46               | <b>Slc6a11</b> | 0.39               | <b>Asna1</b>    | 1.39               | <b>Atp6v1f</b>  | 0.42               |
| <b>Pdk3</b>     | 0.80               | <b>Epg5</b>    | 7.40               | <b>Ube2v1</b>   | 0.38               | <b>Mapk8ip3</b> | 0.79               |
| <b>Chmp6</b>    | 0.47               | <b>Atp5f1a</b> | 1.34               | <b>Ca2</b>      | 0.83               | <b>Mmp25</b>    | 2.11               |
| <b>Rplp1</b>    | 1.33               | <b>Slc20a2</b> | 1.76               | <b>Wars</b>     | 0.78               | <b>Sptb</b>     | 1.33               |
| <b>Fbxo43</b>   | 1.33               | <b>Glod4</b>   | 0.78               | <b>Hnrnp1</b>   | 1.37               | <b>Ppp3ca</b>   | 1.26               |
| <b>L1cam</b>    | 1.57               | <b>Eif5a</b>   | 1.71               | <b>Tomm22</b>   | 1.38               | <b>Plcb1</b>    | 0.67               |
| <b>Uqcrfs1</b>  | 1.46               | <b>Fscn1</b>   | 1.27               | <b>Smyd5</b>    | 1.34               | <b>Epm2aip1</b> | 1.30               |
| <b>Sdhb</b>     | 1.21               | <b>Farsa</b>   | 1.97               | <b>Smap1</b>    | 1.22               | <b>Actr1a</b>   | 1.23               |
| <b>Cops6</b>    | 1.46               | <b>Vdac2</b>   | 0.84               | <b>Etfa</b>     | 1.15               | <b>Cox5b</b>    | 0.20               |
| <b>Tmem74</b>   | 0.42               | <b>Me1</b>     | 1.28               | <b>Psm4</b>     | 1.29               | <b>Huwe1</b>    | 1.43               |
| <b>Rab1A</b>    | 1.43               | <b>Surf4</b>   | 0.73               | <b>Vps4a</b>    | 1.35               | <b>Ube2m</b>    | 1.32               |
| <b>Fmn1</b>     | 1.89               | <b>Gpd1</b>    | 1.38               | <b>Sult4a1</b>  | 0.62               | <b>Tfap2e</b>   | 1.41               |
| <b>Rps15a</b>   | 0.63               | <b>Dctn2</b>   | 1.37               | <b>Prdx1</b>    | 0.80               | <b>Cox4i1</b>   | 0.76               |
| <b>Aspa</b>     | 0.67               | <b>Cpne5</b>   | 1.47               | <b>Slc25a18</b> | 0.45               |                 |                    |
| <b>Ap1s1</b>    | 1.69               | <b>Tbcc</b>    | 1.37               | <b>Twf2</b>     | 1.45               |                 |                    |
| <b>Dnajb2</b>   | 1.70               | <b>Actn1</b>   | 1.26               | <b>Pin1</b>     | 1.23               |                 |                    |
| <b>Sirpa</b>    | 1.39               | <b>Dpysl4</b>  | 1.18               | <b>Gdap1</b>    | 0.76               |                 |                    |

**Supplementary Table 5. List of proteins that are altered in the prefrontal cortex of MGO-injected WT mice.** Mouse proteins nomenclature is used.

| <b>Protein</b> | <b>Fold-change</b> | <b>Protein</b> | <b>Fold-change</b> | <b>Protein</b> | <b>Fold-change</b> | <b>Protein</b> | <b>Fold-change</b> |
|----------------|--------------------|----------------|--------------------|----------------|--------------------|----------------|--------------------|
| Vim            | 1.53               | Ranbp1         | 1.27               | Psd3           | 1.23               | Mcrs1          | 1.82               |
| Ube2n          | 0.72               | Acot7          | 0.61               | Anxa5          | 1.40               | Nae1           | 0.82               |
| Hadh           | 1.75               | Camkv          | 0.80               | Napg           | 1.15               | Slc44a1        | 1.61               |
| Gfap           | 2.01               | Svip           | 2.99               | Efr3b          | 0.54               | Akap7          | 2.62               |
| Psmb7          | 0.66               | Glrx3          | 1.28               | Myo5a          | 0.86               | Prps1          | 3.23               |
| Slc6a17        | 1.59               | Hnrnpu         | 1.26               | Atp2b2         | 0.86               | Eno2           | 0.84               |
| Nceh1          | 0.73               | Vgf            | 0.67               | Plxna4         | 0.74               | Ehd3           | 1.17               |
| Dip2a          | 0.56               | Fntb           | 9.47               | Hadhb          | 1.82               | Agap3          | 1.23               |
| Rdx            | 1.21               | Acot13         | 1.26               | Cacna1e        | 0.55               | Prkcb          | 0.81               |
| Git1           | 0.76               | Hnrnpc         | 1.32               | Necap1         | 0.75               | Aars           | 0.71               |
| Vcp            | 0.84               | Esd            | 0.77               | Fdps           | 0.76               | Rcc2           | 0.56               |
| Ppp1cb         | 0.64               | Anxa7          | 1.24               | Sdhc           | 1.20               | Atp6v0a1       | 1.13               |
| Snrpg          | 1.44               | Kcnab2         | 0.66               | Copg2          | 0.81               | Fah            | 0.22               |
| Hebp1          | 0.75               | Ckb            | 1.29               | Epha4          | 0.83               | Acbd6          | 1.30               |
| Gucy1b1        | 1.72               | Grin2b         | 0.77               | Atp1a3         | 1.21               | Rtcb           | 1.17               |
| Purb           | 3.97               | Gstm5          | 1.21               | Atp5pf         | 1.24               | Wars           | 0.67               |
| Hspa4          | 0.84               | Etfb           | 1.24               | Tspan7         | 0.52               | Plpbb          | 1.21               |
| Septin7        | 0.78               | Arf3           | 0.42               | Dpp10          | 0.80               | Dnm1l          | 0.71               |
| Scamp1         | 2.06               | Cul3           | 0.57               | Lap3           | 1.34               | Pde1b          | 0.68               |
| Uqcrh          | 1.35               | Gng2           | 0.75               | Ywhah          | 0.71               | Ube2k          | 0.77               |
| Dnajb2         | 0.72               | Prdx2          | 1.22               | Agk            | 1.15               | Add2           | 0.87               |
| Ap1g1          | 2.13               | Grin1          | 0.67               | Pitpna         | 1.64               | Slc17a7        | 0.81               |
| Fam49b         | 0.84               | Abi2           | 0.52               | Mrps22         | 0.68               | Tollip         | 1.10               |
| Fabp3          | 1.38               | Gmps           | 1.30               | Ethe1          | 1.65               | Rap1b          | 0.77               |
| Oxct1          | 0.79               | Canx           | 1.22               | Prune1         | 0.71               | Got2           | 0.90               |
| Atp6v1f        | 0.72               | Akr1b1         | 1.19               | Ndufs4         | 0.78               | Csnk2a1        | 0.82               |
| Samm50         | 0.44               | Syt1           | 1.20               | Nptn           | 1.26               | Ddb1           | 0.75               |
| Atp6v0d1       | 0.77               | Dnaja1         | 0.51               | Pgm3           | 0.28               | Wdr37          | 0.76               |
| Cbr3           | 1.79               | Cpne5          | 0.80               | Vbp1           | 0.76               | Atp5pd         | 1.11               |
| Uchl1          | 1.35               | Dynll1         | 1.19               | Oxr1           | 1.46               | Vdac3          | 0.85               |
| Cycs           | 1.28               | Chgb           | 0.40               | Rack1          | 1.28               | Rab5c          | 0.61               |
| Selenbp2       | 1.53               | Rimbp2         | 0.58               | Rps8           | 0.90               | Arhgap32       | 0.73               |
| Rps5           | 4.58               | Pls3           | 1.33               | Basp1          | 1.21               | Ywhag          | 0.83               |
| Hibch          | 1.30               | Lsamp          | 0.85               | Bag6           | 0.55               | Prpsap2        | 1.79               |
| Septin6        | 0.80               | Atp6ap1        | 0.74               | Chchd3         | 0.88               | Acp1           | 0.65               |
| Rps28          | 1.33               | Krt77          | 1.97               | Atp5mf         | 1.11               | Tomm22         | 0.79               |
| Acyp2          | 2.28               | Rpl28          | 1.19               | Sacm11         | 1.22               | Atad3          | 0.66               |
| Sfxn3          | 1.22               | Acadl          | 0.74               | Ist1           | 1.46               | Fech           | 0.71               |

| <b>Protein</b> | <b>Fold-change</b> | <b>Protein</b>  | <b>Fold-change</b> | <b>Protein</b>  | <b>Fold-change</b> | <b>Protein</b> | <b>Fold-change</b> |
|----------------|--------------------|-----------------|--------------------|-----------------|--------------------|----------------|--------------------|
| <b>Mthfd1</b>  | 1.53               | <b>Eif3e</b>    | 0.69               | <b>Ndufab1</b>  | 0.75               | <b>Cplx1</b>   | 1.28               |
| <b>Psmd12</b>  | 0.85               | <b>Lypla2</b>   | 1.50               | <b>Gk</b>       | 2.07               | <b>Dcaf15</b>  | 0.50               |
| <b>Grhpr</b>   | 1.26               | <b>Septin11</b> | 1.56               | <b>Krt75</b>    | 3.55               | <b>Vps51</b>   | 0.45               |
| <b>Prep</b>    | 0.58               | <b>Cnn3</b>     | 1.42               | <b>Sh3bgrl3</b> | 0.67               | <b>Hbb-b2</b>  | 0.34               |
| <b>Ca2</b>     | 0.64               | <b>Atp1b1</b>   | 1.19               | <b>Akap12</b>   | 1.93               | <b>Lypla1</b>  | 1.52               |
| <b>Tubb4a</b>  | 0.88               | <b>Cds2</b>     | 1.25               | <b>Cntnap2</b>  | 0.83               | <b>Pak3</b>    | 0.64               |
| <b>Cdc42</b>   | 1.75               | <b>Kcnc3</b>    | 0.69               | <b>Ppia</b>     | 0.81               | <b>Etfa</b>    | 1.16               |
| <b>Pacs1</b>   | 0.69               | <b>Adcy2</b>    | 0.62               | <b>Hspa5</b>    | 1.14               | <b>Calm3</b>   | 1.29               |
| <b>Ptpa</b>    | 0.75               | <b>Ndufa12</b>  | 1.21               | <b>Aco1</b>     | 0.77               | <b>Tuba4a</b>  | 0.81               |
| <b>Cct3</b>    | 1.29               | <b>Decr1</b>    | 1.17               | <b>Tceal5</b>   | 2.80               | <b>Ndufa8</b>  | 1.19               |
| <b>Pi4ka</b>   | 0.71               | <b>Cs</b>       | 1.16               | <b>Aldh2</b>    | 1.18               | <b>Slc1a3</b>  | 1.22               |
| <b>Atox1</b>   | 1.28               | <b>Scepdh</b>   | 0.86               | <b>Slc27a4</b>  | 1.90               |                |                    |
| <b>Mras</b>    | 1.49               | <b>Cyfp2</b>    | 0.69               | <b>Wwc1</b>     | 0.69               |                |                    |
| <b>Dlgap1</b>  | 3.48               | <b>Clic4</b>    | 1.43               | <b>App</b>      | 0.81               |                |                    |

**Supplementary Table 6. List of proteins that are commonly altered by MGO (MGO-WT vs Veh-WT) and aSyn (Veh-Thy1-aSyn vs Veh-WT) in the midbrain.** Mouse proteins nomenclature is used.

| <b>Protein</b>  | <b>Fold-change<br/>MGO vs Veh</b> | <b>Fold-change<br/>Thy1 vs WT</b> | <b>Protein</b>  | <b>Fold-change<br/>MGO vs Veh</b> | <b>Fold-change<br/>Thy1 vs WT</b> |
|-----------------|-----------------------------------|-----------------------------------|-----------------|-----------------------------------|-----------------------------------|
| <b>Gltp</b>     | 0.19                              | 0.32                              | <b>Rps12</b>    | 0.70                              | 0.79                              |
| <b>Uqcrh</b>    | 2.54                              | 2.30                              | <b>Cab39</b>    | 1.54                              | 1.28                              |
| <b>Ndufs2</b>   | 0.60                              | 0.83                              | <b>Itgb1</b>    | 0.70                              | 0.72                              |
| <b>Ank3</b>     | 0.51                              | 0.52                              | <b>Psmb5</b>    | 0.56                              | 0.86                              |
| <b>Ppp2ca</b>   | 1.95                              | 1.31                              | <b>Rack1</b>    | 1.56                              | 1.36                              |
| <b>Grb2</b>     | 0.53                              | 0.56                              | <b>Glod4</b>    | 0.78                              | 0.86                              |
| <b>Septin2</b>  | 1.49                              | 1.12                              | <b>Surf4</b>    | 0.73                              | 0.69                              |
| <b>Cops8</b>    | 2.03                              | 1.17                              | <b>Actn1</b>    | 1.26                              | 1.52                              |
| <b>Eef1g</b>    | 1.45                              | 1.40                              | <b>Ahsa1</b>    | 1.62                              | 1.31                              |
| <b>Hacd3</b>    | 0.72                              | 0.82                              | <b>Tstd3</b>    | 0.55                              | 0.55                              |
| <b>Septin9</b>  | 1.93                              | 1.55                              | <b>Pcca</b>     | 0.49                              | 0.48                              |
| <b>Ap3d1</b>    | 1.86                              | 1.28                              | <b>Mtpn</b>     | 1.34                              | 1.25                              |
| <b>Gdi2</b>     | 0.59                              | 0.83                              | <b>Myadm</b>    | 1.94                              | 1.67                              |
| <b>Bphl</b>     | 3.67                              | 5.21                              | <b>Kif15</b>    | 0.22                              | 0.07                              |
| <b>Sparcl1</b>  | 2.18                              | 1.62                              | <b>Wbp2</b>     | 0.64                              | 0.56                              |
| <b>Kif5c</b>    | 1.79                              | 1.38                              | <b>Taldo1</b>   | 1.31                              | 1.45                              |
| <b>Atp6v1g2</b> | 1.42                              | 1.31                              | <b>Mtch2</b>    | 0.29                              | 0.31                              |
| <b>Pls1</b>     | 0.40                              | 0.36                              | <b>Cacna2d2</b> | 1.30                              | 1.28                              |
| <b>Chmp6</b>    | 0.47                              | 0.54                              | <b>Ly6h</b>     | 0.61                              | 0.66                              |
| <b>Uqcrfs1</b>  | 1.46                              | 1.35                              | <b>Pea15</b>    | 0.69                              | 0.55                              |
| <b>Sdhb</b>     | 1.21                              | 1.23                              | <b>Bag6</b>     | 0.46                              | 0.44                              |
| <b>Tmem74</b>   | 0.42                              | 0.33                              | <b>Arpc3</b>    | 1.24                              | 1.34                              |
| <b>Snca</b>     | 1.60                              | 7.71                              | <b>Krt85</b>    | 1.44                              | 2.06                              |
| <b>Ndufa4</b>   | 0.69                              | 0.74                              | <b>Smyd5</b>    | 1.34                              | 1.46                              |
| <b>Rplp0</b>    | 1.48                              | 1.63                              | <b>Rpl7</b>     | 1.19                              | 1.23                              |
| <b>Prdx3</b>    | 1.39                              | 1.23                              | <b>Rpl24</b>    | 1.15                              | 1.18                              |
| <b>Clpp</b>     | 0.64                              | 0.85                              | <b>Fntb</b>     | 5.34                              | 2.76                              |
| <b>Syt12</b>    | 1.87                              | 1.91                              | <b>Tagln</b>    | 1.98                              | 1.60                              |
| <b>Timm9</b>    | 0.66                              | 0.82                              | <b>Atp1a3</b>   | 0.87                              | 0.80                              |
| <b>Fh</b>       | 1.21                              | 1.11                              | <b>Mapk10</b>   | 0.83                              | 0.82                              |
| <b>Capn2</b>    | 1.25                              | 1.20                              | <b>Alyref</b>   | 0.36                              | 0.25                              |
| <b>Snap47</b>   | 0.52                              | 0.39                              | <b>Afg3l2</b>   | 0.89                              | 0.84                              |
| <b>Atp5fle</b>  | 0.41                              | 0.55                              | <b>Napb</b>     | 0.55                              | 0.82                              |
| <b>Atpaf1</b>   | 0.55                              | 0.56                              | <b>Aldh6a1</b>  | 0.87                              | 0.85                              |
| <b>Vps35</b>    | 0.81                              | 0.81                              | <b>Pdxk</b>     | 0.75                              | 0.77                              |
| <b>Slc25a4</b>  | 0.82                              | 0.87                              | <b>Plcb1</b>    | 0.67                              | 0.54                              |

**Supplementary Table 7. List of proteins that are glycosylated in the midbrain of MGO-injected Thy1-aSyn mice.** Mouse proteins nomenclature is used.

| Protein | Protein  | Protein | Protein  | Protein   | Protein  | Protein | Protein     |
|---------|----------|---------|----------|-----------|----------|---------|-------------|
| Aadat   | C2orf42  | Dnajc13 | Hadh     | Mbp       | Pbrm1    | Rpl24   | Tigd5       |
| Abca2   | C6orf132 | Dnajc25 | Hap1     | Mcm6      | Pcca     | Rpl26l1 | Tjp1        |
| Abcb10  | Caena1i  | Dnajc9  | Hck      | Mdm1      | Pesk6    | Rpl27   | Tlx3        |
| Abhd16a | Caena1s  | Dnm11   | Hells    | Mdn1      | Pde1b    | Rpl7    | Tmem201     |
| Acan    | Cadm2    | Dock5   | Herc4    | Mecp2     | Pde4dip  | Rpl7a   | Tmem216     |
| Acod1   | Cadm4    | Dpysl3  | Hgs      | Med24     | Pdia3    | Rpl8    | Tmprss6     |
| Acs11   | Cadps2   | Drp2    | Hist1h4a | Mff       | Pdzd3    | Rps24   | Tnfrsf10a   |
| Acs16   | Calb2    | Dsp     | Hmcn2    | Mfhas1    | Pfkfb1   | Rps6    | Tnn         |
| Actn3   | Camk2a   | Dst     | Hnrnpk   | Mfsd6l    | Pfkip    | Rrbp1   | Tnxb        |
| Adam22  | Camk2b   | Dtna    | Hsp90aa1 | Mib2      | Pgm1     | Rrp8    | Tom112      |
| Adgr12  | Camk2d   | Dync1h1 | Hsp90ab1 | Mical2    | Pgp      | Rrs1    | Top1mt      |
| Agap3   | Camk2g   | Ebf1    | Hspb1    | Mmrn1     | Phf24    | Rtel1   | Trappc10    |
| Agrn    | Cand1    | Echdc2  | Htra1    | Mov10l1   | Phf3     | Rtn3    | Trav38-2dv8 |
| Ahcy11  | Cask     | Eddm13  | Htra3    | Mphosph10 | Phlda1   | Ruvbl2  | Trim28      |
| Ahcy12  | Caskin1  | Efhd2   | Hydin    | Mrpl47    | Phlda3   | Ryr3    | Trim39      |
| Aifm3   | Cat      | Eftud2  | Idua     | Mrps18b   | Pick1    | S1pr1   | Tro         |
| Akr1b10 | Cavin3   | Egr3    | Igsf3    | Mrps26    | Pik3ca   | Sash1   | Trrap       |
| Aldh1b1 | Ccdc102a | Eif3a   | Immt     | Ms4a5     | Pik3r1   | Sash3   | Tsks        |
| Aldh2   | Ccdc120  | Eif4h   | Ina      | Mtmr9     | Pikfyve  | Scaf11  | Ttc39b      |
| Aldh6a1 | Ccdc60   | Eloa3   | Inpp11   | Myh9      | Pitpna   | Scmh1   | Ttf2        |
| Aldoa   | Ccdc66   | Elovl6  | Ints6l   | Myo18a    | Plagl2   | Scn2a   | Ttn         |
| Aldoc   | Ccdc77   | Elp1    | Ipo5     | Myo3a     | Plcb1    | Sdk1    | Tubb        |
| Alg6    | Ccdc88b  | Eno1    | Ipp      | Myo5a     | Plec     | Sdr42e2 | Tubb2a      |
| Alg8    | Ccdc91   | Epha7   | Iqcd     | Myo5b     | Plekhg3  | Sec14l1 | Tubb2b      |
| Alms1   | Cd2ap    | Erbb3   | Iqcm     | Myo9b     | Plxnb1   | Sema4c  | Tubb4a      |
| Amer2   | Cdc123   | Ercc6l  | Iqsec1   | Myom2     | Pomgnt1  | Serbp1  | Tubb4b      |
| Ampd2   | Cdc14a   | Ercc6l2 | Iqsec2   | Mysm1     | Ppfia1   | Setbp1  | Tulp2       |
| Ank3    | Cdc7     | Erich3  | Iscu     | Nadk2     | Ppfia4   | Sgip1   | Tyw3        |
| Ankrd17 | Cdh5     | Ervk-19 | Isg20    | Nbea      | Ppp1cb   | Sh3gl1  | Ube2v2      |
| Ankrd63 | Cdhr1    | Esyt2   | Jakmip3  | Nck2      | Ppp1r12b | Sh3gl2  | Ube3b       |
| Anks1b  | Cdk15    | Etfb    | Jmy      | Ncor2     | Ppp1r12c | Shank3  | Ube3d       |
| Aoc1    | Cenpf    | Etfhdh  | Kat2b    | Ndrp4     | Ppp1r9b  | Shld3   | Upf3b       |
| Ap1b1   | Cep120   | Evpl    | Kcnab2   | Ndufa2    | Ppp2r1a  | Shprh   | Uqerc1      |
| Ap2b1   | Cep162   | F8      | Kcnh2    | Ndufs1    | Ppp2r5d  | Ska2    | Ushbp1      |
| App     | Cep250   | Fads2   | Kcnh3    | Ndufs2    | Ppp2r5e  | Skp1    | Uso1        |
| Aqr     | Cep290   | Fads6   | Kcnq5    | Ndufs5    | Ppp3ca   | Slc12a4 | Usp1712     |
| Arf6    | Cfap54   | Fam135a | Kctd19   | Nebi      | Ppp3cb   | Slc12a5 | Usp24       |
| Arfrp1  | Cfap57   | Fam173b | Khsrp    | Nefh      | Ppp4r3a  | Slc16a8 | Usp35       |

| Protein   | Protein  | Protein | Protein   | Protein  | Protein  | Protein | Protein |
|-----------|----------|---------|-----------|----------|----------|---------|---------|
| Arhgap21  | Chd8     | Fam53b  | Kiaa0100  | Nefl     | Prag1    | Slc22a2 | Usp43   |
| Arhgap23  | Chtf8    | Fam71e1 | Kiaa1549l | Nefm     | Prdm5    | Slc24a4 | Utp20   |
| Arhgap28  | Ckmt1a   | Fam83e  | Kiaa1551  | Nf1      | Prdx3    | Slc25a5 | Uts2r   |
| Arid4b    | Clip2    | Farsb   | Kif1a     | Nf2      | Prdx5    | Slc2a4  | Vars    |
| Arid5b    | Cltc     | Fat1    | Kif21a    | Nfasc    | Prep     | Slc34a1 | Vbp1    |
| Arl6ip1   | Cmas     | Fat2    | Kif21b    | Nfatc2ip | Prim2    | Slc4a3  | Vcp     |
| Arl6ip5   | Cntrl    | Fbxo39  | Kif26a    | Nin      | Prkar2b  | Slc7a14 | Virma   |
| Arrdc3    | Coch     | Fer1l6  | Kif5c     | Nkx6-3   | Prkdc    | Smardc2 | Wasf1   |
| Asic4     | Cog1     | Fezf2   | Kifap3    | Nlrp13   | Prpf3    | Snap91  | Wdr6    |
| Aspm      | Col16a1  | Fga     | Kirrel1   | Nolc1    | Psap     | Snph    | Wdsub1  |
| Atf6      | Col24a1  | Fhod3   | Klc3      | Npm1     | Psm3     | Snx29   | Wnk4    |
| Atg2b     | Col6a2   | Fkbp8   | Klhl17    | Nr2c2    | Psmc2    | Soat1   | Wnt1    |
| Atp1a3    | Col9a1   | Fmn1    | Klhl2     | Nrac     | Ptpn11   | Son     | Wnt10a  |
| Atp1b1    | Colgalt1 | Fn1     | Krr1      | Nrg2     | Pum3     | Spata20 | Wwc3    |
| Atp2a2    | Coq8a    | Fnbp1   | Krt80     | Nsd2     | Qki      | Sphk1   | Yipf1   |
| Atp2b3    | Cplane1  | Fscn1   | Lama2     | Nsd3     | Rab12    | Spib    | Zbtb11  |
| Atp5f1a   | Crocc2   | Fsip1   | Lama5     | Nsun7    | Rab34    | Spink8  | Zbtb16  |
| Atp5f1b   | Cs       | Fsip2   | Lca5      | Nucks1   | Ralgapa2 | Sptan1  | Zbtb21  |
| Atp5f1c   | Cspg5    | Fxyd1   | Ldlrap1   | Nuded3   | Rasa2    | Sptbn1  | Zc3h7a  |
| Atp6v0a2  | Ctnnb1   | Gal3st2 | Lmtk2     | Obscn    | Rb1cc1   | Sptbn5  | Zdhhc8  |
| Atp6v1c1  | Ctsf     | Gart    | Lonrf3    | Ocl1     | Rbm12b   | Spz1    | Zfx4    |
| Atp6v1g2  | Cyp27a1  | Gas2l3  | Lrig3     | Ogdh     | Rbm19    | Srrm2   | Zmym2   |
| Atp8a1    | Ddhd2    | Gatd3a  | Lrp1      | Ogfr     | Rbm3     | Srrm3   | Znf195  |
| Atp9a     | Ddrgk1   | Ghrh    | Lrp2      | Omg      | Rdh14    | Srsf11  | Znf407  |
| Avpi1     | Ddx3x    | Gli3    | Lrrc74a   | Ophn1    | Reep1    | Srsf3   | Znf491  |
| Best3     | Ddx4     | Glud1   | Lrrc8a    | Or10j1   | Rep15    | Srsf7   | Znf516  |
| Bet1      | Def6     | Gna14   | Lrrd1     | Or4c3    | Rev3l    | Ssna1   | Znf629  |
| Bfsp1     | Dennd4c  | Gng3    | Lym4      | Or52h1   | Rgs9     | St13p5  | Znf672  |
| Brap      | Depdc5   | Gnptab  | Lzts3     | Osbpl5   | Rhbdf1   | Stk11ip | Znf681  |
| Brf2      | Dgat217p | Golga3  | Macf1     | Otol1    | Rif1     | Suclg1  | Znf707  |
| Brinp2    | Dgkh     | Gphn    | Maged4    | Otud7a   | Riok1    | Suclg2  | Znf723  |
| Brms1     | Dgkk     | Gpi     | Maoa      | Ovos1    | Riox1    | Syne1   | Znf724  |
| Brms11    | Dhx16    | Grasp   | Map1a     | Oxct1    | Rmnd1    | Syt1    | Znf726  |
| Bsn       | Dhx9     | Grhl3   | Map2      | Oxsm     | Rnf44    | Taf1l   | Znf764  |
| Btbd11    | Dip2c    | Gripap1 | Map9      | Oxsr1    | Rock2    | Tas2r7  | Znf804b |
| C10orf113 | Dlat     | Grk3    | Mapre2    | Pabpc4   | Rph3a    | Tcaf1   | Znf806  |
| C11orf88  | Dnah10   | Gucy2d  | Mast1     | Pacs1    | Rpia     | Tcigr1  | Znf816  |
| C12orf66  | Dnah8    | H1fx    | Mast4     | Pacsin3  | Rpl14    | Tenm4   |         |
| C12orf74  | Dnah9    | H2afy   | Mat2a     | Pam      | Rpl15    | Tfap2b  |         |
| C22orf42  | Dnaja2   | Habp4   | Matn4     | Parp4    | Rpl19    | Tiam2   |         |

**Supplementary Table 8. List of proteins that are exclusively glycosylated in the midbrain of MGO-injected Thy1-aSyn mice.** Mouse proteins nomenclature is used.

| Protein  | Protein  | Protein | Protein   | Protein       | Protein  | Protein | Protein |
|----------|----------|---------|-----------|---------------|----------|---------|---------|
| Aadat    | Cacna1s  | Elovl6  | Hells     | Mfsd6l        | Pfkfb1   | S1pr1   | Trim39  |
| Abcb10   | Cadm2    | Ercc6l  | Hgs       | Mib2          | Pgm1     | Sash3   | Tro     |
| Abhd16a  | Calb2    | Ercc6l2 | Hmcn2     | Mical2        | Pgp      | Scmh1   | Tsks    |
| Acan     | Cavin3   | Erich3  | Hspb1     | Mmrn1         | Phlda1   | Sdk1    | Ttc39b  |
| Acod1    | Ccdc66   | Esyt2   | Htra1     | Mov10l1       | Pik3ca   | Sdr42e2 | Tulp2   |
| Acsl1    | Ccdc77   | Etfb    | Htra3     | Mphosph1<br>0 | Pik3r1   | Sema4c  | Tyw3    |
| Actn3    | Ccdc91   | Etfdh   | Idua      | Mrpl47        | Pikfyve  | Sh3gl1  | Ube3d   |
| Adam22   | Cd2ap    | Evpl    | Igsf3     | Mrps18b       | Plagl2   | Shank3  | Upf3b   |
| Adgrl2   | Cdc123   | F8      | Immt      | Ms4a5         | Plekhg3  | Shld3   | Uqcrc1  |
| Agrn     | Cdc14a   | Fam135a | Ipp       | Mtmr9         | Pomgnt1  | Shprh   | Usp17l2 |
| Ahcy1l   | Cdc7     | Fam173b | Iqcd      | Myo9b         | Ppp1r12b | Ska2    | Usp35   |
| Aifm3    | Cdh5     | Fam71e1 | Iqcm      | Mysm1         | Ppp1r12c | Slc12a4 | Virma   |
| Aldoc    | Cdhr1    | Fam83e  | Iscu      | Nadk2         | Ppp2r1a  | Slc16a8 | Wdr6    |
| Alg6     | Cdkl5    | Farsb   | Isg20     | Nbea          | Prag1    | Slc22a2 | Wdsub1  |
| Alg8     | Cenpf    | Fat1    | Jakmip3   | Nck2          | Prdx3    | Slc24a4 | Wnk4    |
| Amer2    | Cep120   | Fat2    | Kat2b     | Ncor2         | Prim2    | Slc34a1 | Wnt1    |
| Ankrd63  | Cep162   | Fbxo39  | Kcnab2    | Ndr4          | Prkdc    | Slc4a3  | Wnt10a  |
| Anks1b   | Cfap54   | Fer1l6  | Kcnh3     | Ndufa2        | Prpf3    | Slc7a14 | Wwc3    |
| Aoc1     | Chd8     | Fhod3   | Kcnq5     | Nefl          | Psap     | Smarcd2 | Yipf1   |
| Aqr      | Chtf8    | Fkbp8   | Kctd19    | Nf2           | Psm3     | Snap91  | Zbtb11  |
| Arf6     | Cmas     | Fmnl1   | Khsrp     | Nfatc2ip      | Psmc2    | Soat1   | Zbtb16  |
| Arfrp1   | Cog1     | Fnbp1   | Kiaa0100  | Nkx6-3        | Ptpn11   | Son     | Zbtb21  |
| Arhgap23 | Col16a1  | Fscn1   | Kiaa1549l | Nlrp13        | Pum3     | Spata20 | Zdhhc8  |
| Arhgap28 | Col24a1  | Fxyd1   | Kiaa1551  | Nolc1         | Qki      | Sphk1   | Zfhx4   |
| Arid4b   | Col6a2   | Gal3st2 | Kif1a     | Nr2c2         | Rasa2    | Spib    | Zmym2   |
| Arid5b   | Colgalt1 | Gart    | Kif5c     | Nsd3          | Rb1cc1   | Spink8  | Znf195  |
| Arl6ip1  | Coq8a    | Gas2l3  | Kirrel1   | Nsun7         | Rbm3     | Spz1    | Znf407  |
| Arl6ip5  | Ctnnb1   | Gatd3a  | Klc3      | Nucks1        | Rdh14    | Srrm3   | Znf491  |
| Arrdc3   | Ctsf     | Ghrh    | Klhl17    | Nudcd3        | Reep1    | Srsf11  | Znf516  |
| Atf6     | Cyp27a1  | Gli3    | Krr1      | Ogdh          | Rep15    | Syt1    | Znf629  |
| Atg2b    | Ddhd2    | Glud1   | Lama2     | Ogfr          | Rev3l    | Taf1l   | Znf672  |
| Atp2a2   | Ddx3x    | Gna14   | Lama5     | Ophn1         | Rgs9     | Tas2r7  | Znf681  |
| Atp5f1c  | Ddx4     | Gnptab  | Ldlrap1   | Or4c3         | Rif1     | Tcaf1   | Znf707  |
| Atp6v0a2 | Dgkk     | Golga3  | Lmtk2     | Or52h1        | Riok1    | Tenm4   | Znf723  |
| Atp9a    | Dip2c    | Gphn    | Lrig3     | Osbp15        | Rnf44    | Tfap2b  | Znf726  |
| Avpi1    | Dlat     | Gpi     | Lrrc74a   | Otol1         | Rph3a    | Tigd5   | Znf764  |
| Best3    | Dnaja2   | Grasp   | Lrrc8a    | Otud7a        | Rpl14    | Tjp1    | Znf804b |
| Bet1     | Dnajc13  | Grhl3   | Lrrd1     | Oxsr1         | Rpl26l1  | Tlx3    | Znf806  |

| <b>Protein</b>   | <b>Protein</b> | <b>Protein</b> | <b>Protein</b> | <b>Protein</b> | <b>Protein</b> | <b>Protein</b>   | <b>Protein</b> |
|------------------|----------------|----------------|----------------|----------------|----------------|------------------|----------------|
| <b>Bfsp1</b>     | <b>Dnajc9</b>  | <b>Gripap1</b> | <b>Maoa</b>    | <b>Pabpc4</b>  | <b>Rpl27</b>   | <b>Tmem201</b>   | <b>Znf816</b>  |
| <b>Brms1l</b>    | <b>Dock5</b>   | <b>Grk3</b>    | <b>Map9</b>    | <b>Pacsin3</b> | <b>Rpl7a</b>   | <b>Tmem216</b>   |                |
| <b>Btbd11</b>    | <b>Ebf1</b>    | <b>Gucy2d</b>  | <b>Matn4</b>   | <b>Parp4</b>   | <b>Rrbp1</b>   | <b>Tmprss6</b>   |                |
| <b>C10orf113</b> | <b>Eddm13</b>  | <b>H1fx</b>    | <b>Mcm6</b>    | <b>Pcca</b>    | <b>Rrs1</b>    | <b>Tnfrsf10a</b> |                |
| <b>C11orf88</b>  | <b>Eftud2</b>  | <b>Hadh</b>    | <b>Mdm1</b>    | <b>Pde1b</b>   | <b>Rtel1</b>   | <b>Tnn</b>       |                |
| <b>C22orf42</b>  | <b>Egr3</b>    | <b>Hap1</b>    | <b>Med24</b>   | <b>Pde4dip</b> | <b>Rtn3</b>    | <b>Top1mt</b>    |                |
| <b>Cacna1i</b>   | <b>Eif4h</b>   | <b>Hck</b>     | <b>Mfhas1</b>  | <b>Pdzd3</b>   | <b>Ruvbl2</b>  | <b>Trappc10</b>  |                |
